# Supplementary material for: Integrative structural analysis of Pseudomonas phage DEV reveals a genome ejection motor
Source: PubMed Central journal article supplement — Nat Commun. 2024 Oct 1;15:8482. doi: 10.1038/s41467-024-52752-1 (PMC11445570; doi:10.1038/s41467-024-52752-1), 2024-10-01
Supplement: 41467_2024_52752_MOESM1_ESM.pdf [file 41467_2024_52752_MOESM1_ESM.pdf]

## **Integrative structural analysis of *Pseudomonas* phage DEV reveals a genome ejection motor**

Ravi K. Lokareddy <sup>1</sup>, Chun-Feng David Hou <sup>2</sup>, Francesca Forti <sup>3</sup>, Stephano M. Iglesias <sup>4</sup>, Fenglin Li <sup>4</sup>, Mikhail Pavlenok <sup>5</sup>, David S. Horner <sup>3</sup>, Michael Niederweis <sup>5</sup>, Federica Briani <sup>3\*</sup> and Gino Cingolani <sup>1\*</sup>

<sup>1</sup> *Department of Biochemistry and Molecular Genetics, University of Alabama at Birmingham (UAB), 1825 University Blvd, Birmingham, AL 35294, USA*

<sup>2</sup> *Department of Chemistry and Chemical Biology, Rutgers, the State University of New Jersey, Piscataway, NJ 08854, USA*

<sup>3</sup> *Dipartimento di Bioscienze, Università degli Studi di Milano, Milan, Italy*

<sup>4</sup> *Department of Biochemistry and Biophysics, Perelman School of Medicine at the University of Pennsylvania, Philadelphia, Pennsylvania, USA*

<sup>5</sup> *Department of Microbiology, University of Alabama at Birmingham, 845 19th Street South, Birmingham, AL 35294, USA*

### **\*Corresponding Author:**

E-mail: federica.briani@unimi.it; gcingola@uab.edu

**125-character teaser.** Structural annotation of phage DEV structural components, host-absorption fibers, and ejection proteins.

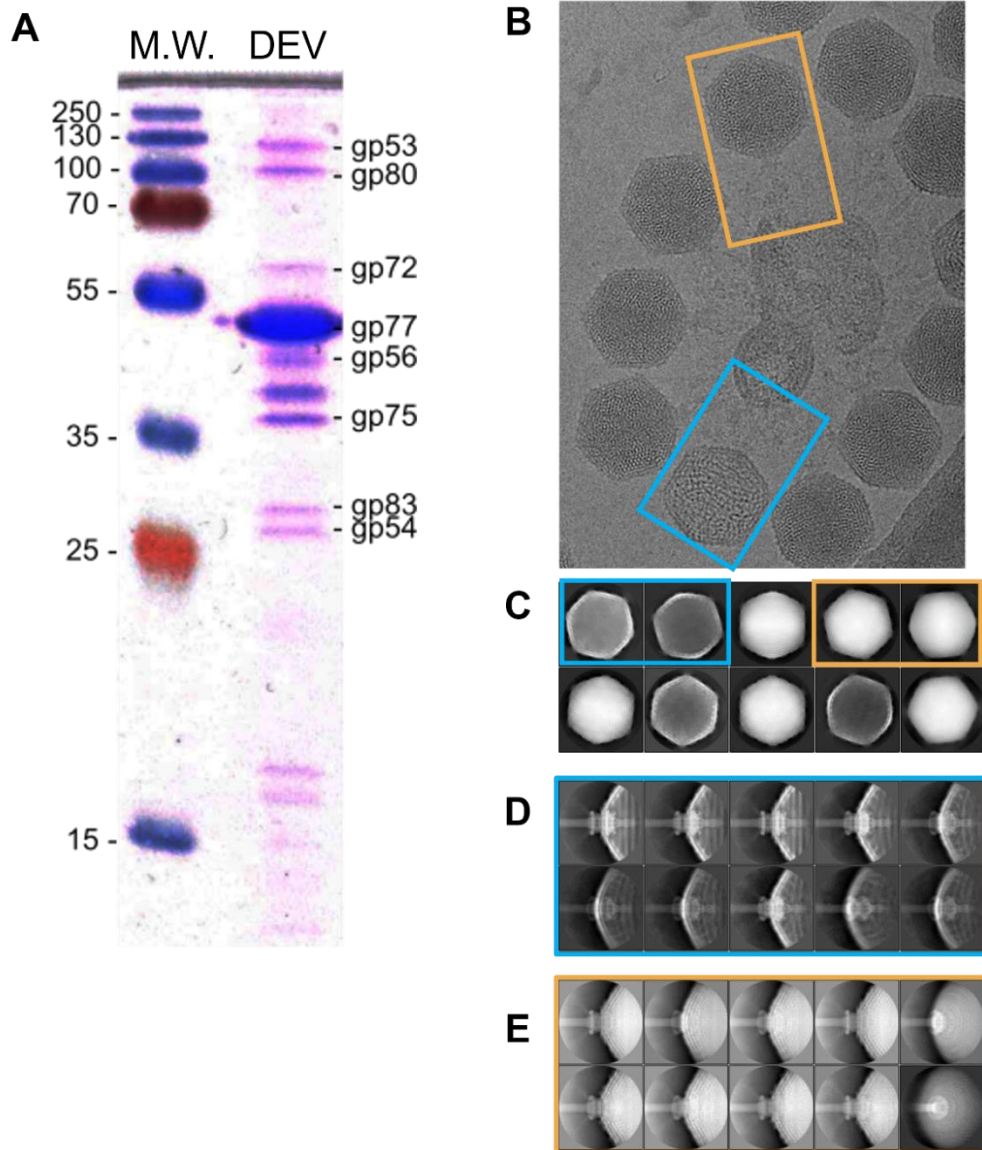

**Supplemental Figure 1. Structural characterization of phage DEV.** (A) SDS-PAGE analysis of DEV infectious virions. Proteins extracted from CsCl<sub>2</sub> gradient-purified DEV particles were analyzed using 15 % SDS-PAGE and Coomassie staining. M.W. = molecular weight marker (kDa). Tentative identification of DEV proteins based on their M.W., assuming possible  $\pm 10\%$  gel shifting, is reported on the right. Only proteins identified in the proteomic analyses of both DEV and LIT1 virions have been considered. The highly abundant gp77 (major coat protein; 44 kDa) migrates with an apparent size of  $\sim 50$  kDa. The vRNAPol gp71 (350 kDa) is not visible, most likely because it does not enter the gel. (B) Representative cryo-micrograph of double CsCl<sub>2</sub> gradient-purified DEV particles. The orange and blue boxes cover a fully-filled (FF) virion and a half-filled (HF) particle. (C) Representative 2D class averages reveal the existence of HF particles (blue frame) and FF virions (orange frame). Nonetheless, both HF and FF had a tail apparatus. Representative localized reconstruction of 2D classes of the neck region for (D) HF particles (blue frame) and (E) FF virions (orange frame).

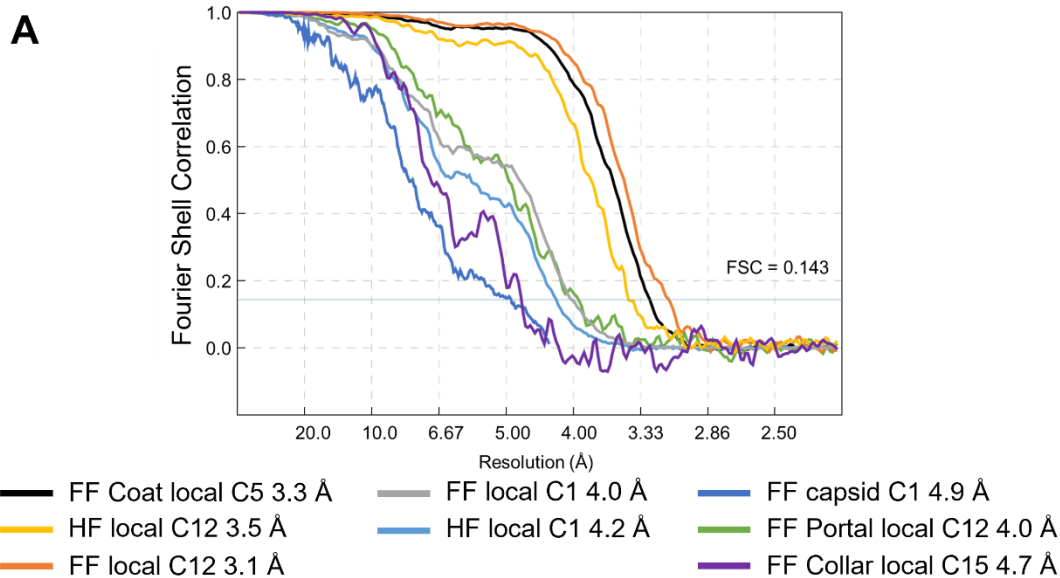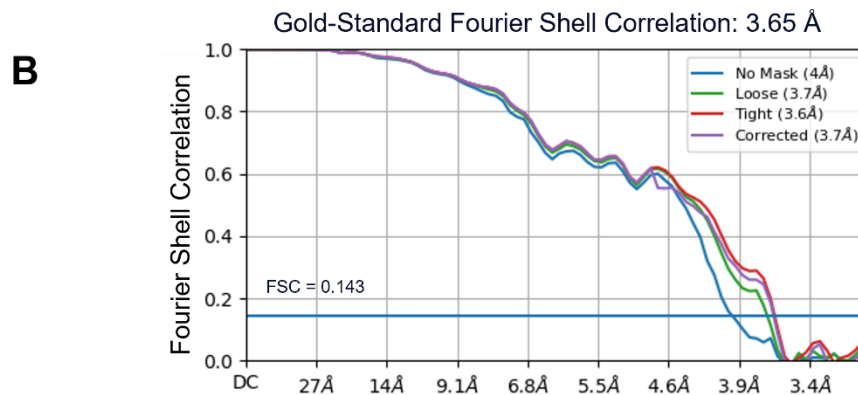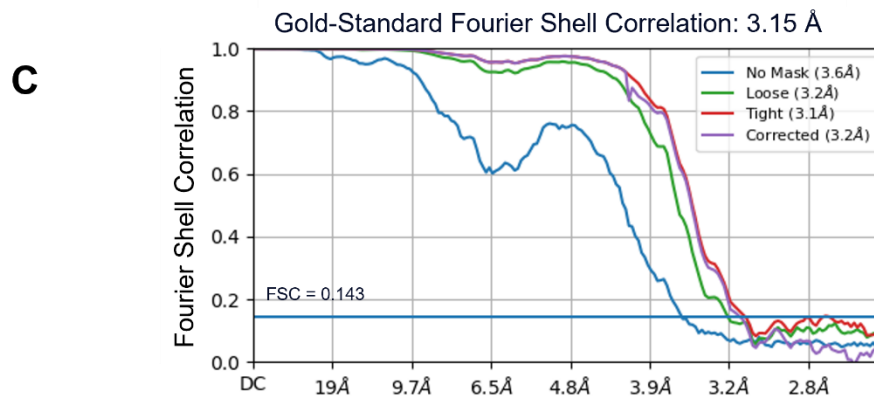

**Supplemental Figure 2. Fourier Shell Correlation (FSC) resolution curves.** (A) FSC curves for all reconstructions of FF virions and HF particles. (B) FSC curves for the cryo-EM reconstruction of recombinant gp72 in the post-ejection conformation. (C) FSC curves for the cryo-EM reconstruction of the recombinant gp72:gp73 complex in the post-ejection conformation. For all curves, the resolution is indicated at 0.143 cut-off.

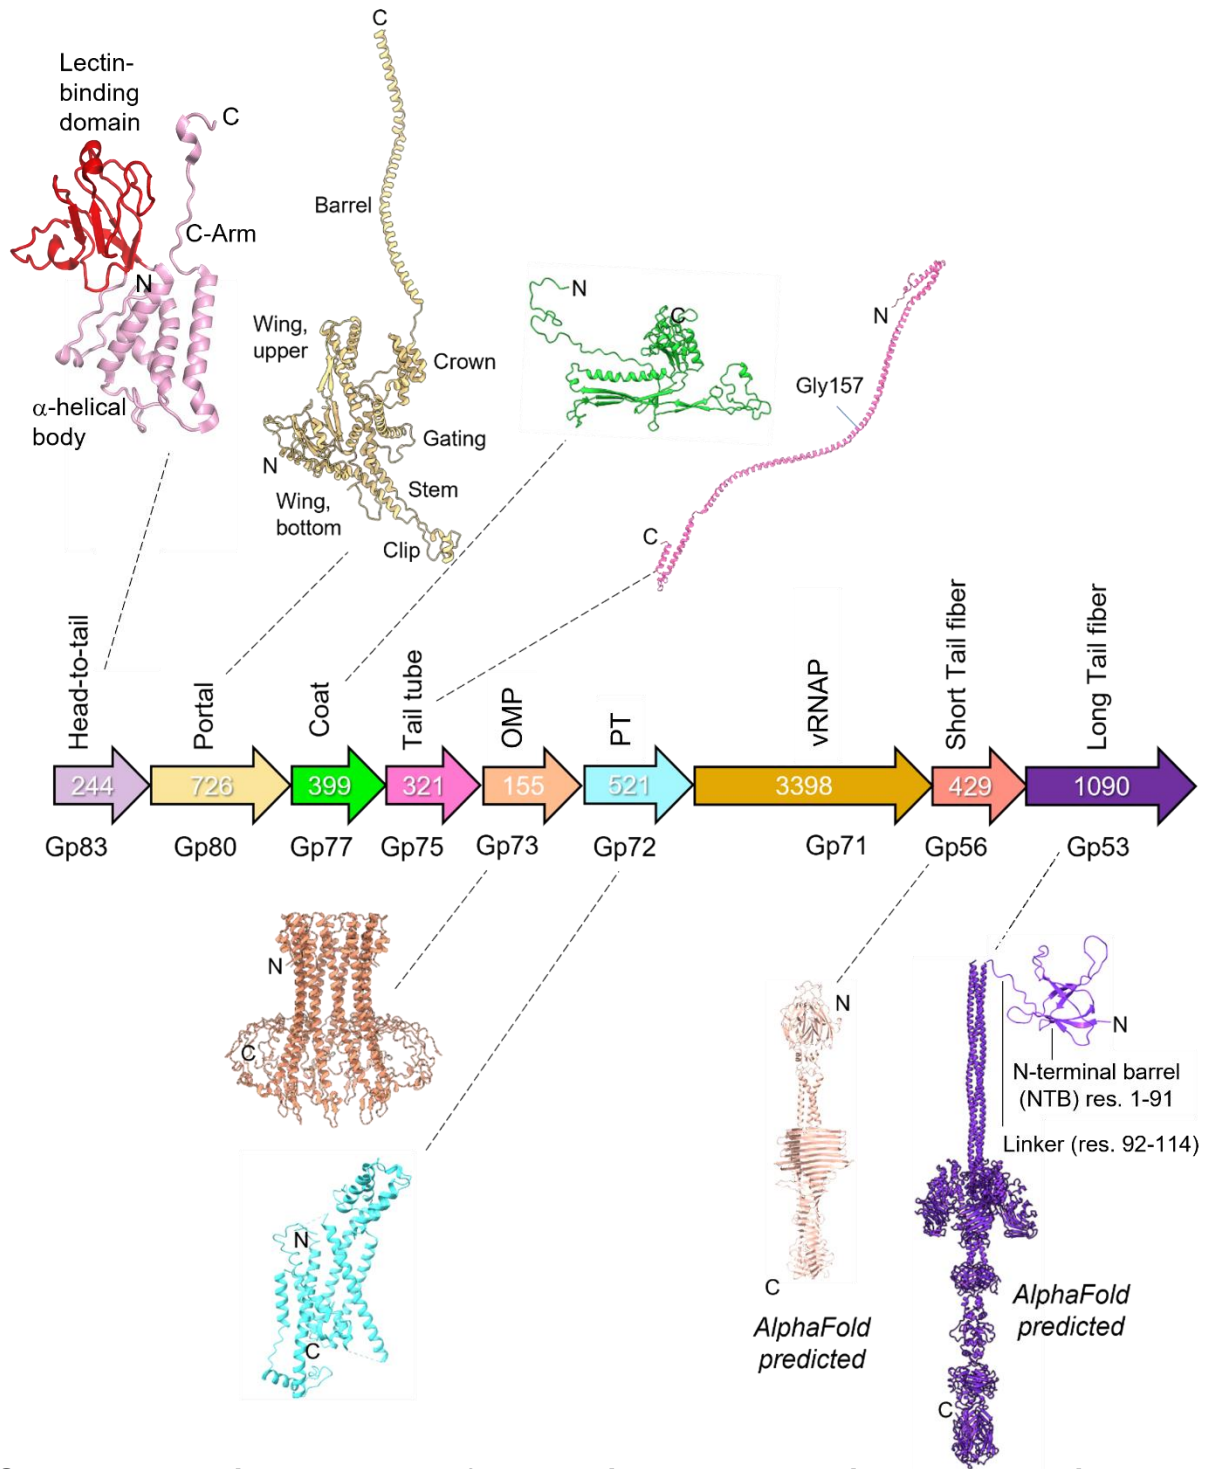

**Supplemental Figure 3. Atlas of all protein structures built in this work.** All DEV proteins were built *de novo* in cryo-EM maps, except for the long-tail fiber gp53 and short-tail fiber gp56, which were predicted by AlphaFold.

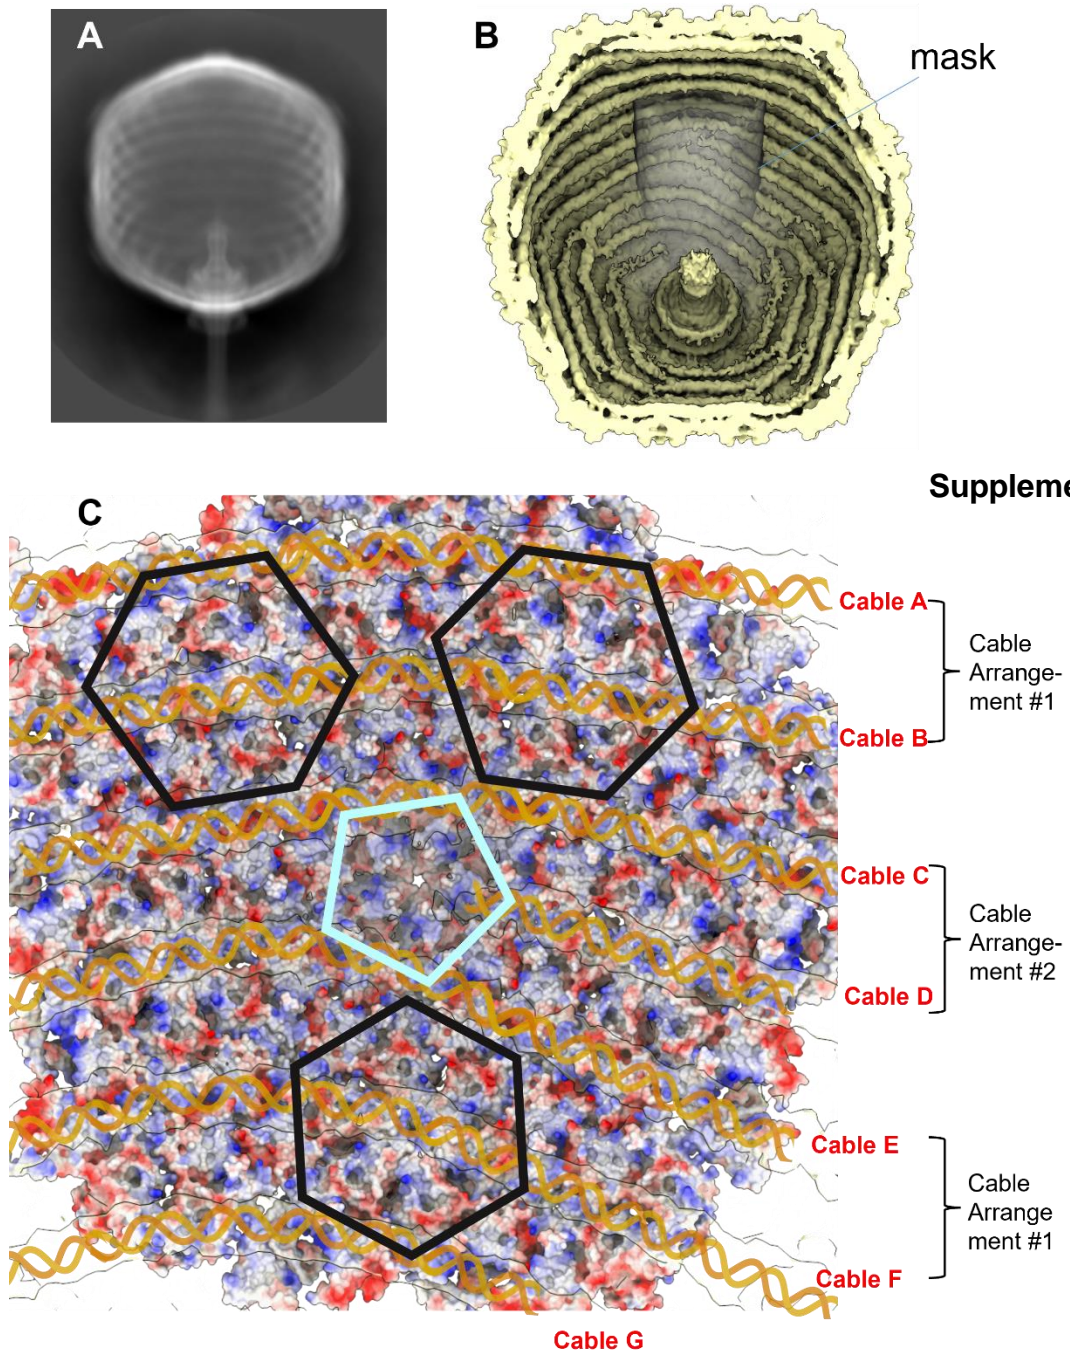

**Figure 4. Localized reconstruction of DEV cables.** (A) An averaged 2D projection from 13 expanded particles aligned locally with the tail (C5-C12 symmetry aligned). (B) A 3D reconstruction from C5-C12 aligned particles showing the interior of the capsid. (C) A focused reconstruction of one capsid five-fold vertex visualized from the inside of the capsid generated using the transparent cylindrical mask shown in panel (B). The density reveals an asymmetric pattern of seven cables (labeled A-G) relative to the capsid exons (black) and penton (gray). Double-stranded DNA helices were modeled inside the cable densities that are displayed onto an electrostatic surface representation of the DEV capsid interior.

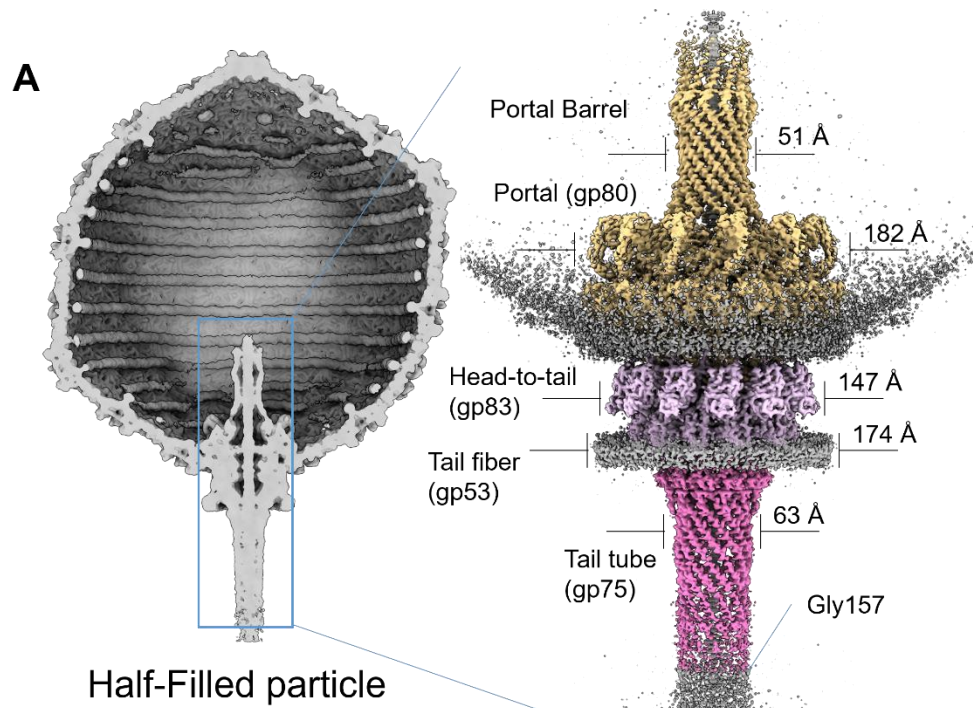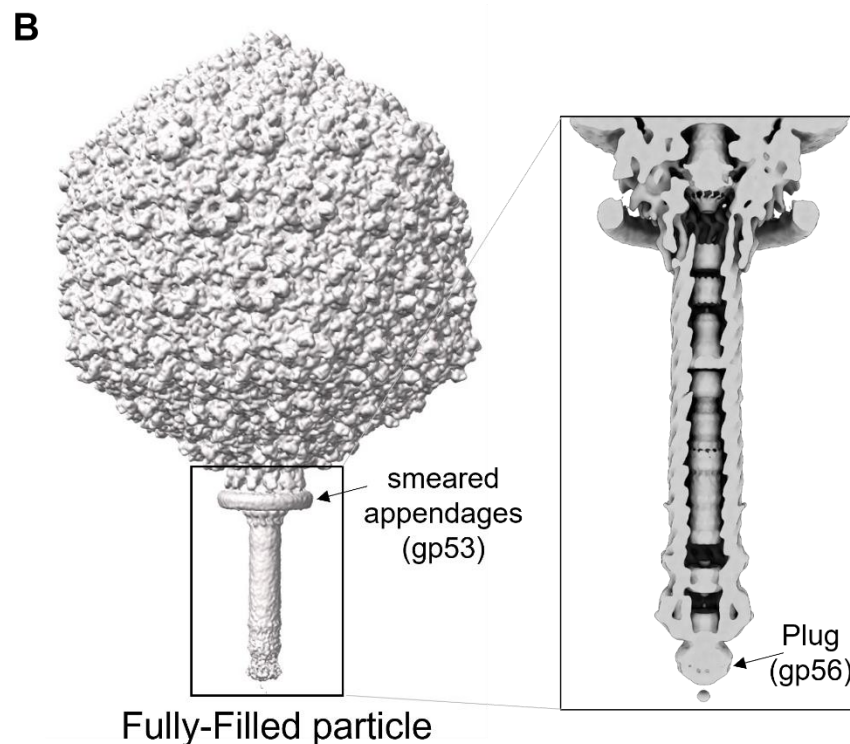

**Supplemental Figure 5. Cryo-EM reconstructions. (A) DEV tail apparatus from Half-Filled particles.** Section view of an HF particle, with a magnified view of the C12, symmetrized localized reconstruction of the unique vertex colored coded by component. The 3.5 Å map is contoured at  $3.5\sigma$ . **(B) C1 reconstruction of DEV mature virion** calculated at 7 Å map and contoured at  $2.0\sigma$  reveals a plug-like density at the tail tube tip, distal from the capsid, that we assigned to gp56.

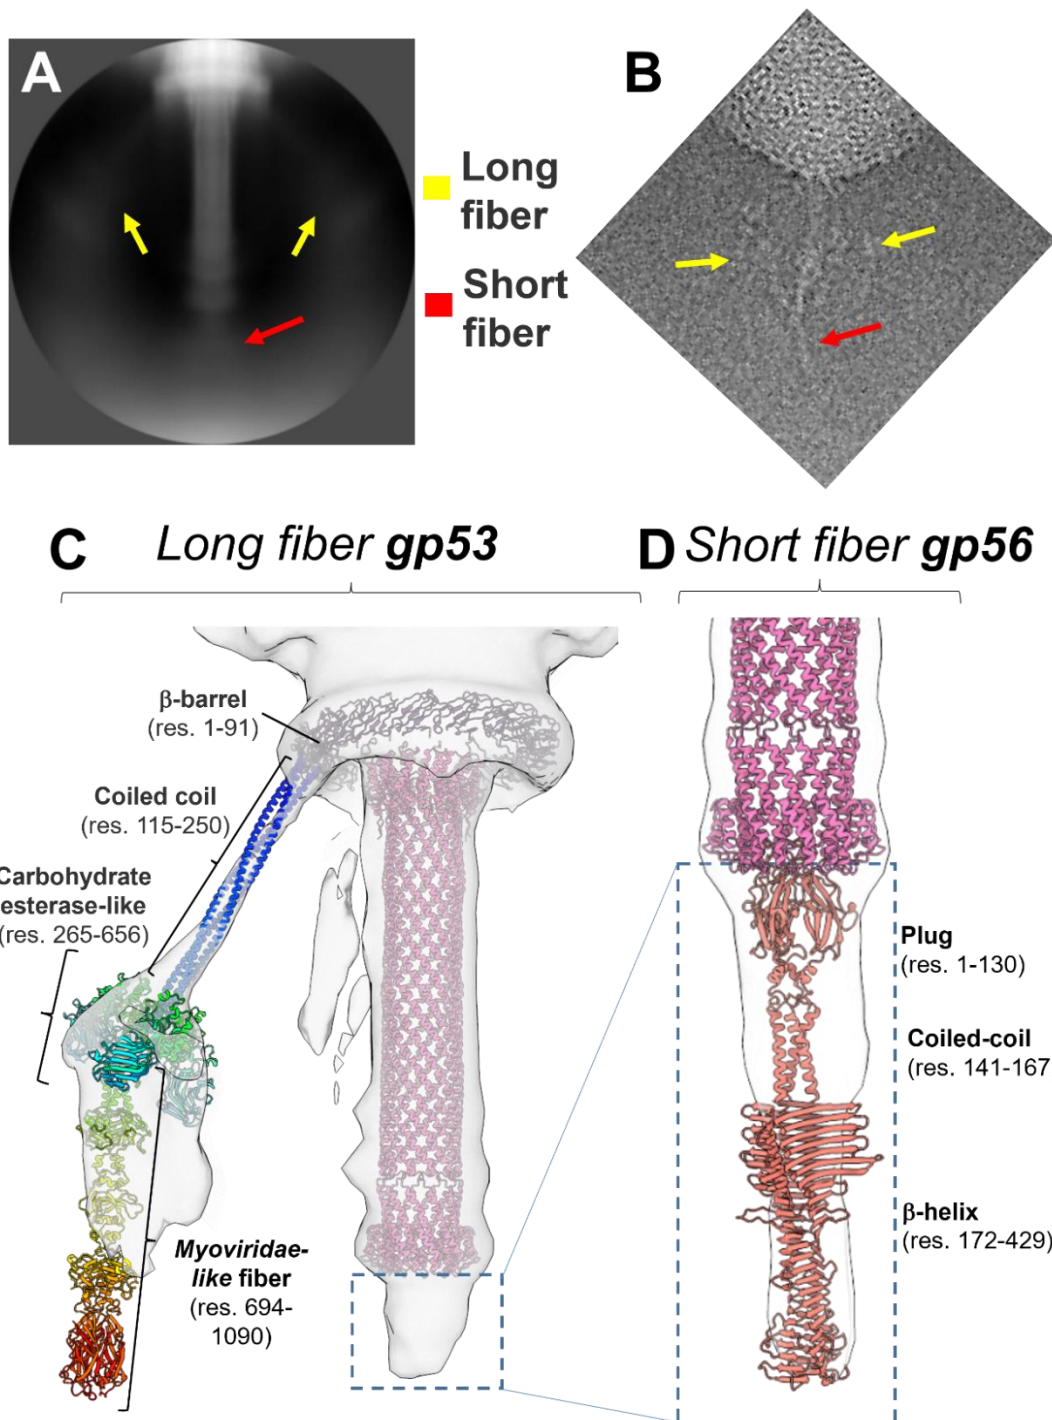

**Supplemental Figure 6. DEV flexible fibers.** (A) Diffused density for DEV fibers emanating from the neck collar is visible in 2D class averages from localized reconstruction (indicated by yellow arrows). A smeared signal is also visible at the distal tip of the tail tube (indicated by a red arrow). (B) The same features are visible in raw micrographs of vitrified DEV. (C-D) Low-resolution localized reconstruction (light gray) was overlaid to the AlphaFold2 models for gp53 (long-tail fiber) and gp56 (short-tail fiber).

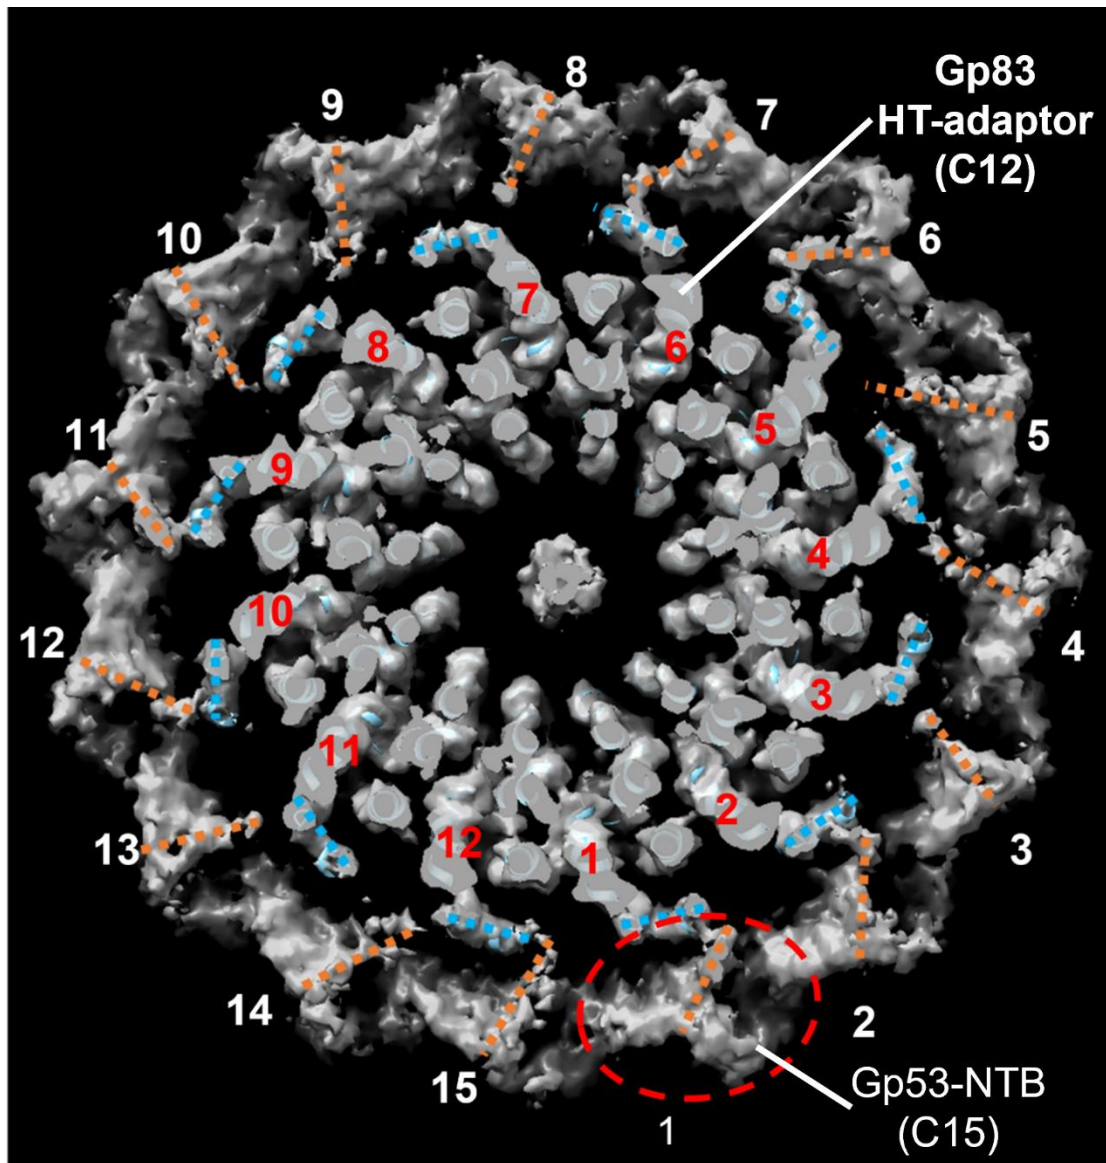

**Supplemental Figure 7. Symmetry mismatch between DEV long tail fiber gp53 and the HT-adaptor gp83.** A cut-out view from inside the capsid of the DEV tail shows a glimpse of the asymmetric C1 map. Gp53 exists in 15 copies (the protomer is circled in red), generating a symmetry mismatch with 12 copies of gp83 (numbered in red).



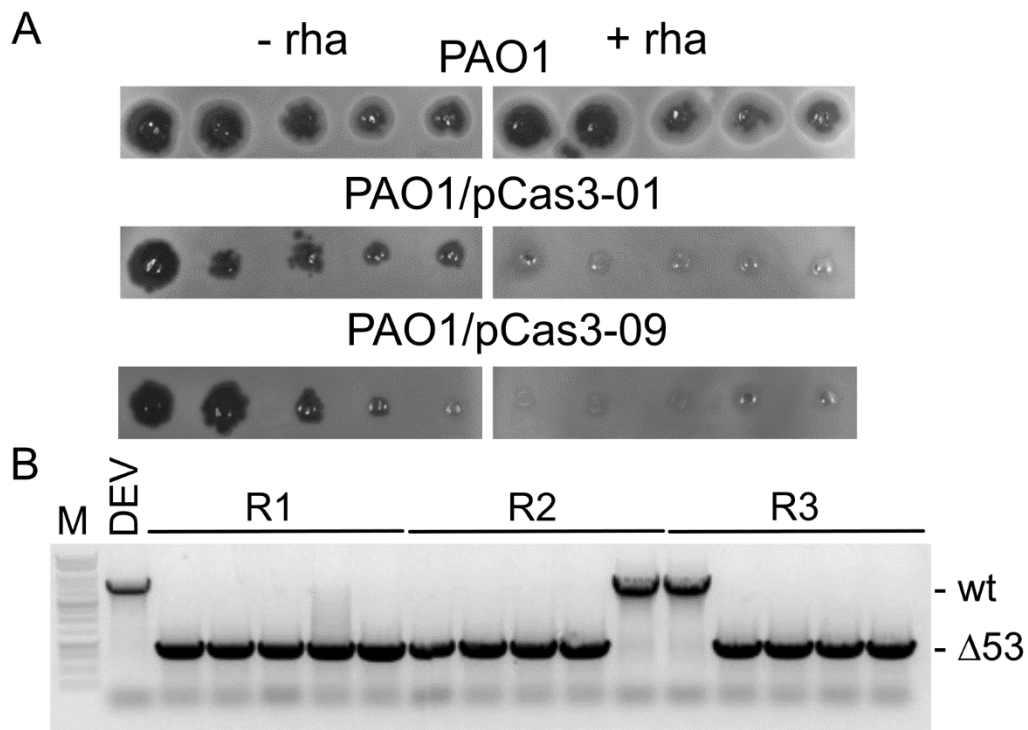

**Supplemental Figure 8. DEV gp53 mutagenesis.** (A) Induction with rhamnose (rha) of cr-RNA53 and cas genes cloned in pCas3-01 and pCas3-09 prevents DEV growth on PAO1. Serial dilutions (x10) of the indicated phages were replicated on the indicated strains with (+) or without (-) rhamnose in the medium. (B) PCR analysis of gp53 locus. Plaques formed by phages able to grow on PAO1 only in the presence of pD53 plasmid were analyzed by PCR with the oligonucleotides 3806-3809. Five plaques derived from each of three replicate mutagenesis experiments, indicated as R1, R2, and R3, were analyzed. DEV, PCR performed on purified DEV DNA.

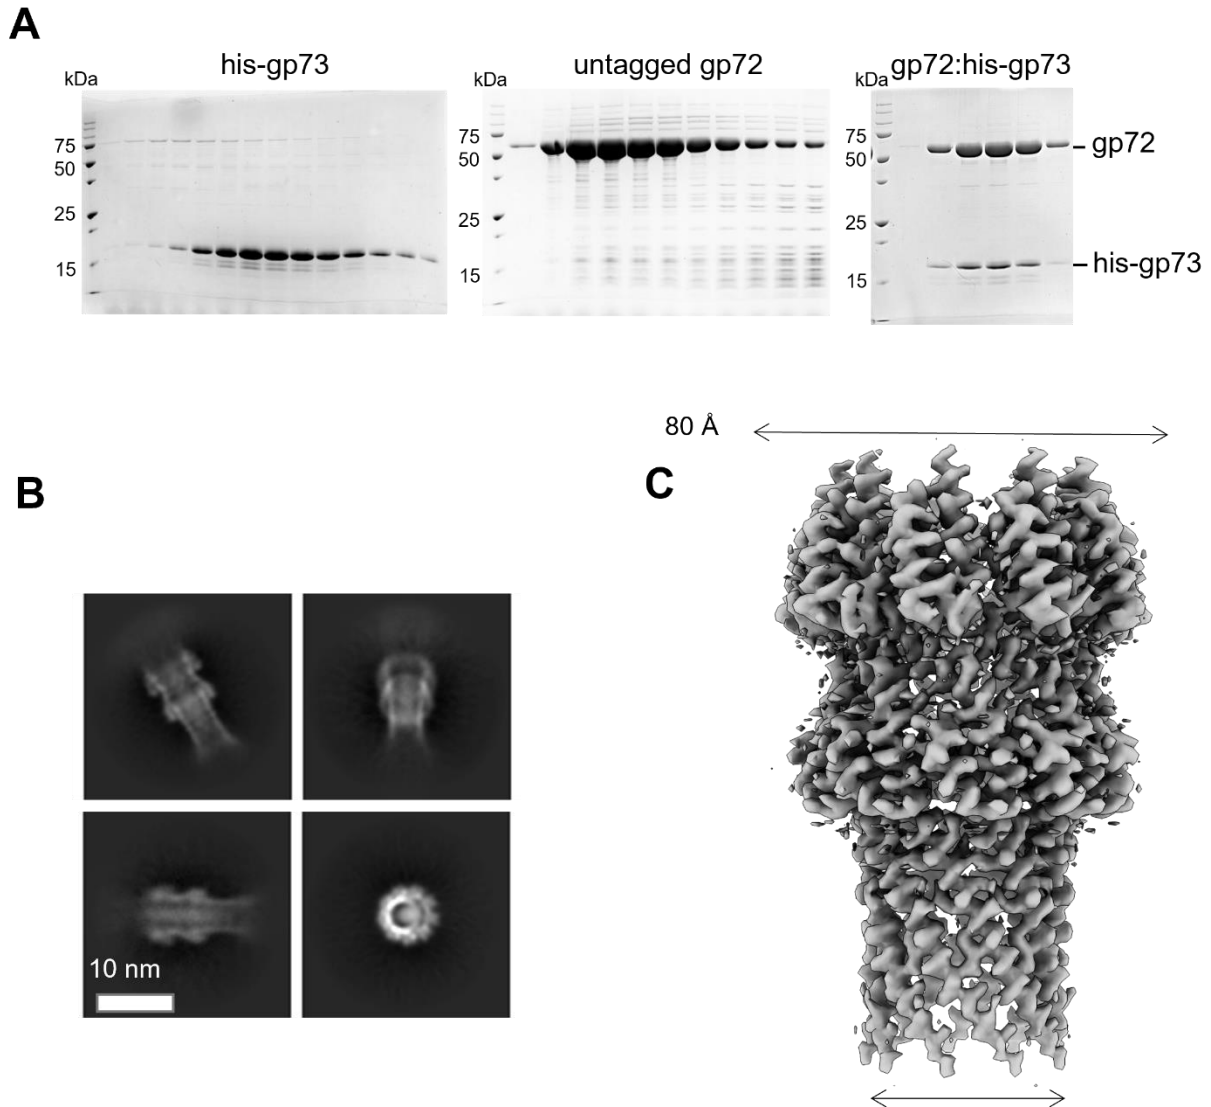

**Supplemental Figure 9. DEV ejection protein gp72.** (A) (left) SDS-PAGE analysis of purified his-gp73 solubilized from membranes; (middle) gp72 expressed under native conditions; (right) gel filtration fractions containing the gp72:gp73 complex. (B) Representative 2D classes of recombinant gp72. (C) 3D reconstruction of gp72 in the post-ejection conformation. The density is calculated at 3.65 Å resolution and is contoured at  $3.5\sigma$ .

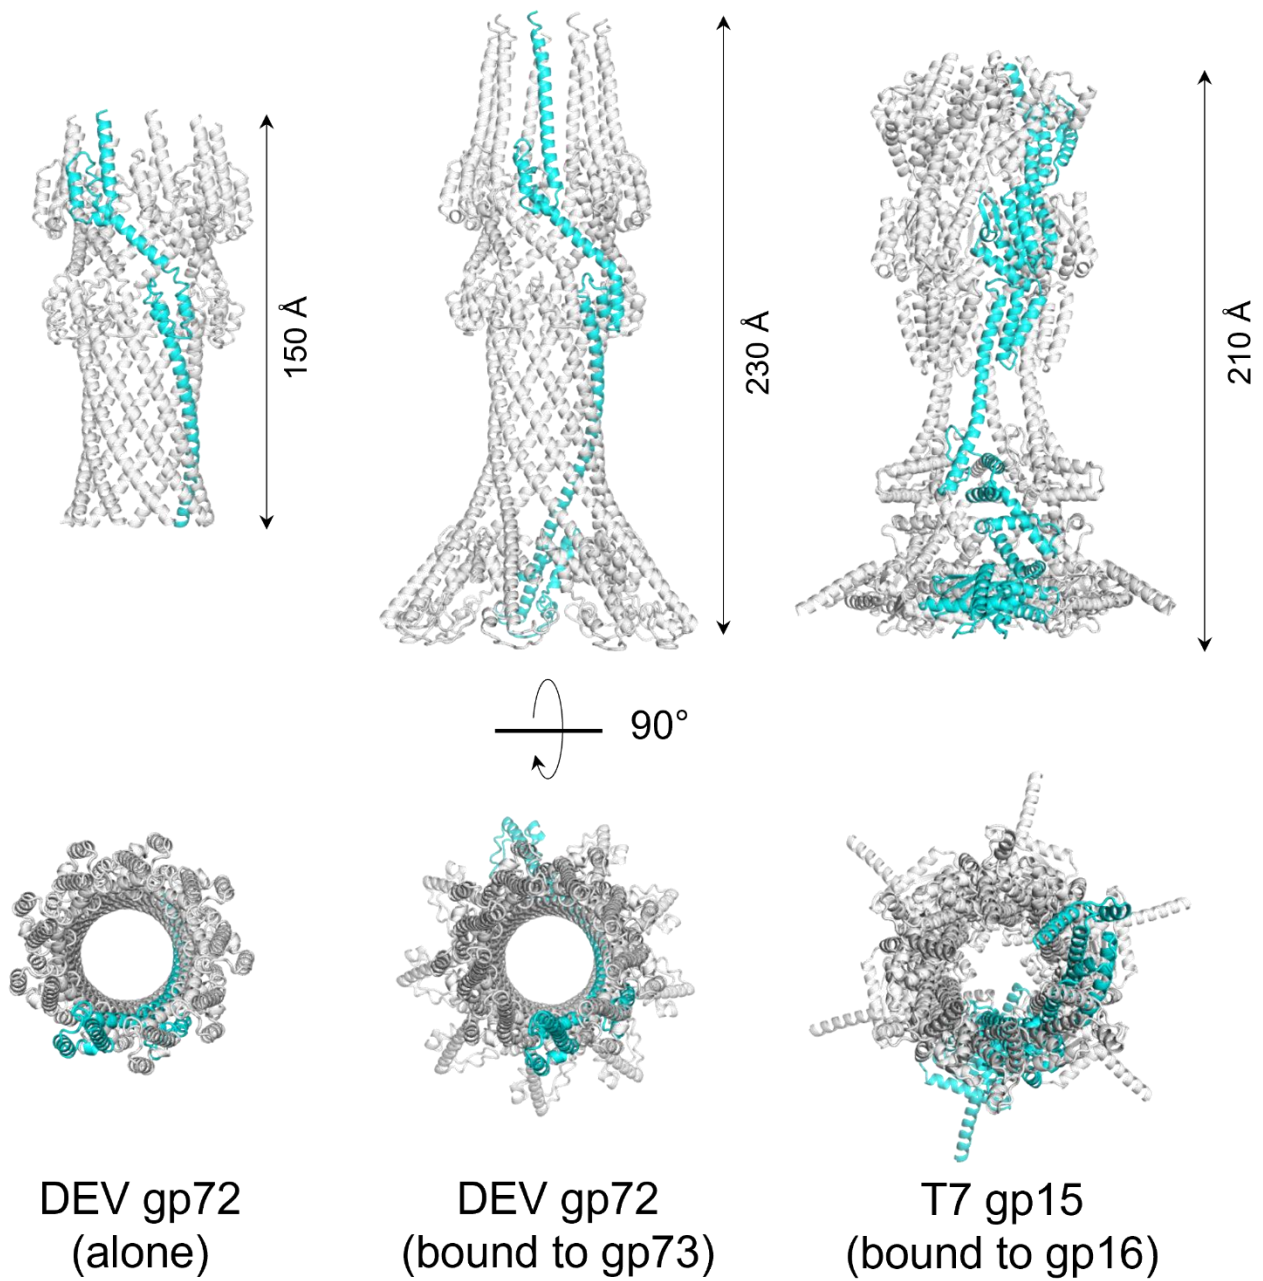

**Supplemental Figure 10. Structural comparison of DEV gp72 (left and middle) and phage T7 gp17 periplasmic tunnel (PT).** The central lumen of either tube-like structure measures 25-30 Å in diameter and is partially gated in T7. In all panels, only one protomer is colored in cyan, and all others are gray.

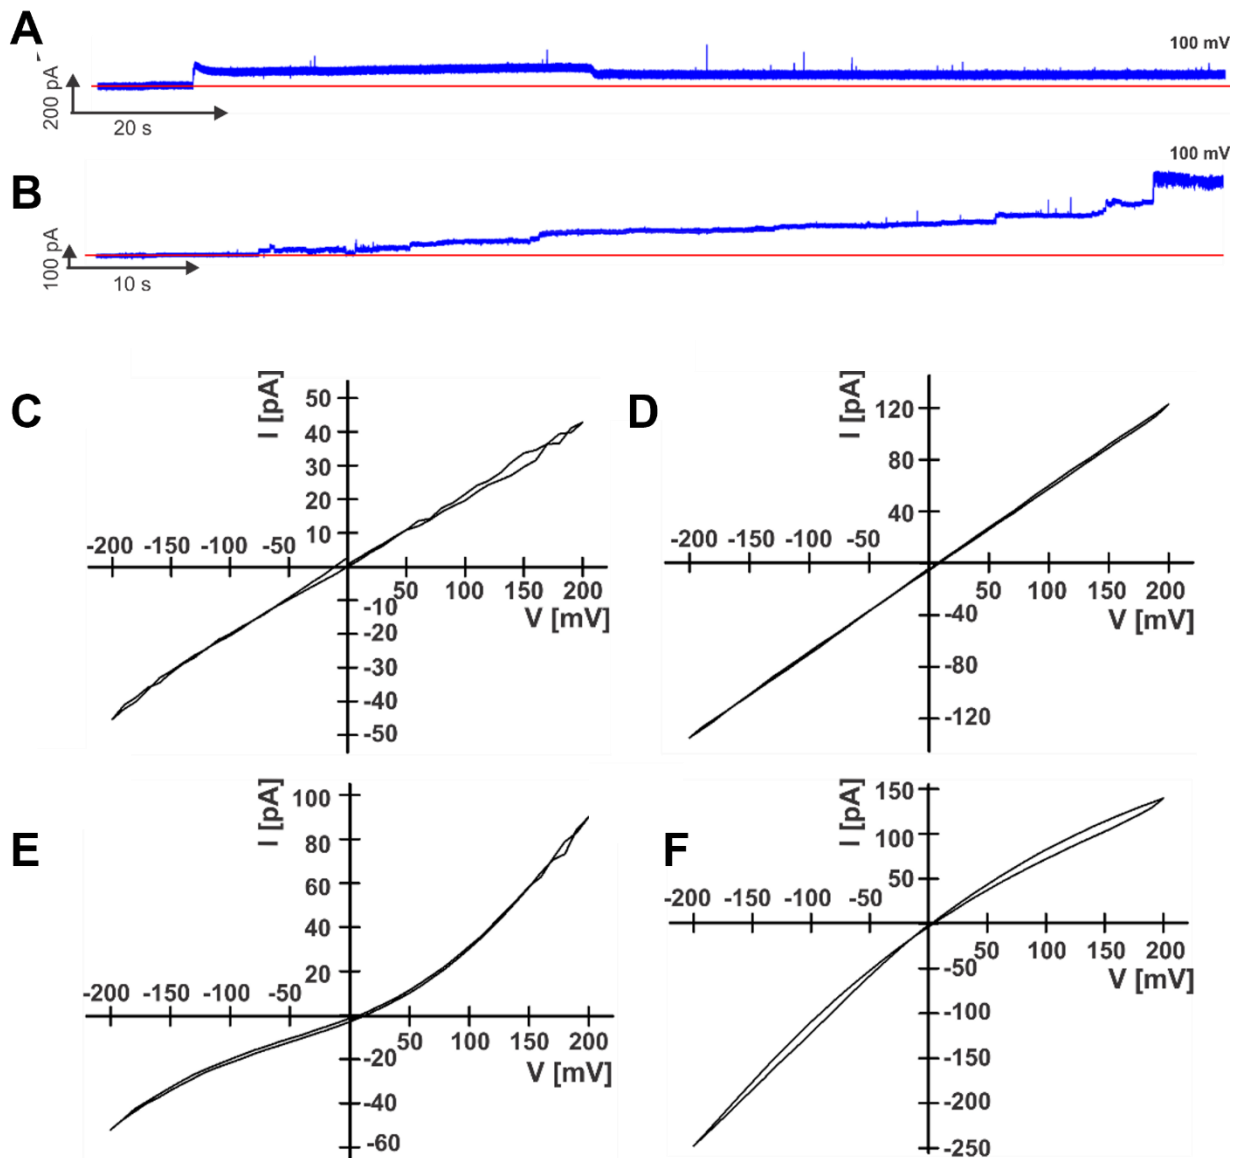

**Supplemental Figure 11. Lipid bilayer experiments with purified gp73.** Current traces with multiple insertions when 2.6  $\mu\text{g}$  (A) or 1.9  $\mu\text{g}$  (B) of protein is present in the cuvette. All experiments were performed at 100 mV applied potential in diphytanoyl phosphatidylcholine (DPhPC) membranes bathed in 1 M KCl, 10 mM HEPES, pH7.4 electrolyte. The protein samples were added to the grounded *cis* side of the cuvette which had 100  $\mu\text{m}$  SU-8 aperture. (C-F) Current-voltage curves of purified gp73. Each panel shows current-voltage curves of one gp73 pore inserted in the membrane at the voltage range of -200 to 200 mV. All experiments were performed in diphytanoyl phosphatidylcholine (DPhPC) membranes bathed in 1 M KCl, 10 mM HEPES, pH 7.4 electrolyte. The protein samples were added to the grounded *cis* side of the cuvette which had 100  $\mu\text{m}$  SU-8 aperture. At 100 mV pores had current amplitude of 21 pA (C), 60 pA (D), 31 pA (E), and 72 pA (F), respectively.

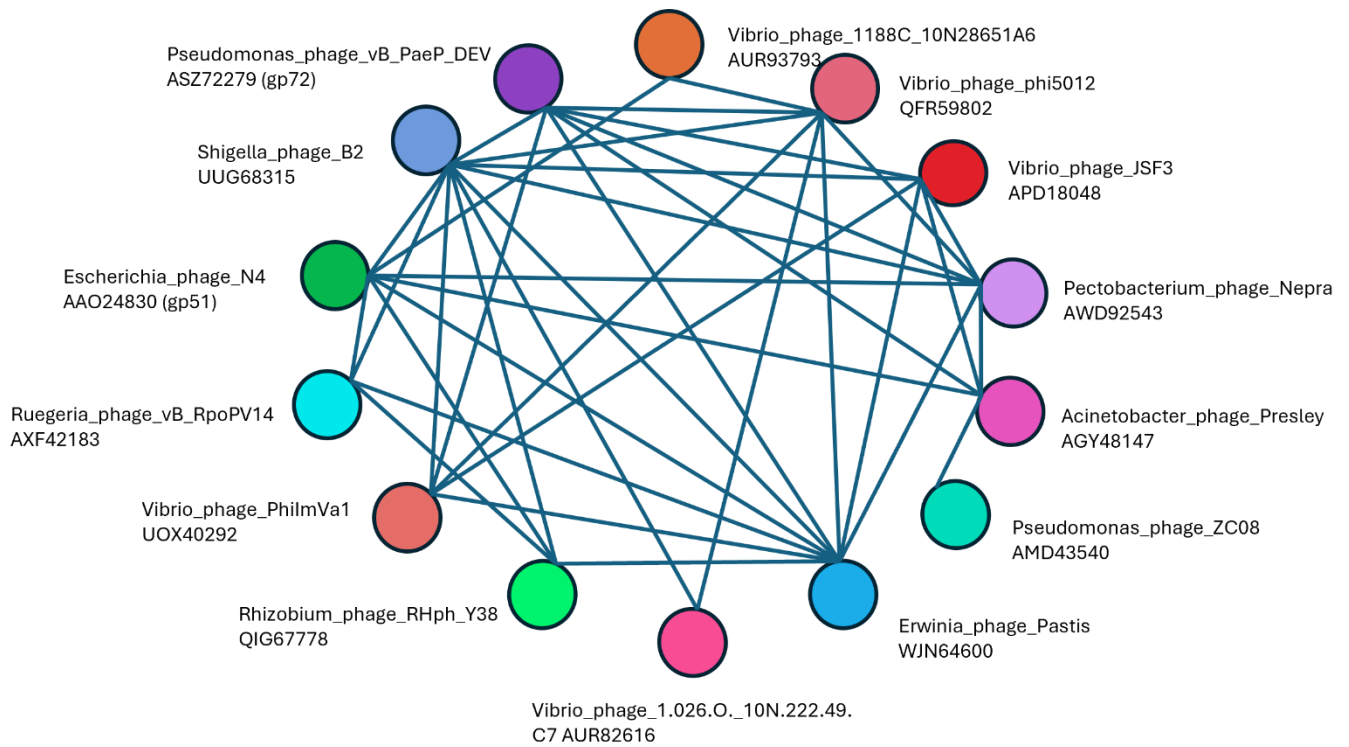

**Supplemental Figure 12. Network diagram showing the significant predictions of gp72 homology based on comparisons of predicted tertiary structure.** The disks are gp72-putative proteins for which AlphaFold predicted the structure. The links show structures with  $\geq 90\%$  probability of being homologs (according to Foldseek <sup>1</sup>).

**Supplementary Table S1. DEV proteins identified by mass spectrometry.**

| Name <sup>a</sup> | Description               | Length (AAs) <sup>b</sup> | MW [kDa] <sup>c</sup> | Coverage [%] | Unique Peptides | SeqEst score  | N4 homologous protein; virion presence <sup>d</sup> |
|-------------------|---------------------------|---------------------------|-----------------------|--------------|-----------------|---------------|-----------------------------------------------------|
| gp27              |                           | 184                       | 21.7                  | 24           | 5               | 12.04         | NH                                                  |
| gp44              |                           | 838                       | 94.1                  | 31           | 21              | 17.75         | gp33; NI                                            |
| gp50              |                           | 170                       | 18.7                  | 29           | 6               | 34.07         | NH                                                  |
| <b>gp53</b>       | <b>Long Tail fiber</b>    | <b>1090</b>               | <b>117.9</b>          | <b>23</b>    | <b>19</b>       | <b>42.70</b>  | <b>NH</b>                                           |
| <b>gp54</b>       |                           | <b>223</b>                | <b>24.9</b>           | <b>30</b>    | <b>6</b>        | <b>10.79</b>  | <b>NH</b>                                           |
| <b>gp56</b>       | <b>Short Tail fiber</b>   | <b>429</b>                | <b>46.3</b>           | <b>12</b>    | <b>5</b>        | <b>5.61</b>   | <b>NH</b>                                           |
| gp60              | Putative DNA primase      | 724                       | 82.4                  | 21           | 15              | 8.65          | gp43; NI                                            |
| <b>gp71</b>       | <b>vRNAP</b>              | <b>3398</b>               | <b>369.5</b>          | <b>31</b>    | <b>86</b>       | <b>235.76</b> | <b>gp50</b>                                         |
| <b>gp72</b>       | <b>Ejection protein</b>   | <b>521</b>                | <b>57.1</b>           | <b>35</b>    | <b>14</b>       | <b>7.95</b>   | <b>NH</b>                                           |
| <b>gp75</b>       | <b>Tail tube</b>          | <b>321</b>                | <b>35.2</b>           | <b>41</b>    | <b>12</b>       | <b>52.45</b>  | <b>gp54</b>                                         |
| gp76              |                           | 221                       | 25.0                  | 47           | 5               | 9.77          | gp55; NI                                            |
| <b>gp77</b>       | <b>Major coat protein</b> | <b>399</b>                | <b>44.0</b>           | <b>67</b>    | <b>21</b>       | <b>833.17</b> | <b>gp56; Y</b>                                      |
| <b>gp80</b>       | <b>Portal protein</b>     | <b>726</b>                | <b>81.6</b>           | <b>50</b>    | <b>32</b>       | <b>164.74</b> | <b>gp59; Y</b>                                      |
| <b>gp83</b>       | <b>Head-tail adaptor</b>  | <b>244</b>                | <b>27.8</b>           | <b>29</b>    | <b>7</b>        | <b>23.00</b>  | <b>gp67; Y</b>                                      |

<sup>a</sup> Proteins identified by  $\geq 5$  unique peptides with a SeqEst score  $\geq 5$ .  
In bold, proteins identified also in the *Litunavirus* LIT1 virions <sup>2</sup>.

DEV gp55, gp73, gp74, and gp78 orthologues of LIT1 virion proteins were identified by 1, 2, 8, and 7 unique peptides, respectively, and SeqEst score of 0. The orthologue of LIT1 gp52 was not detected.

<sup>b</sup> AAs, amino acids.

<sup>c</sup> MW, molecular weight.

<sup>d</sup> The gp names in this column refer to *E. coli* phage N4 nomenclature. NH, No Homologous protein in N4; NI, the homologous protein exists, but it was Not Identified in N4 virions <sup>3</sup>; Y, Yes, the homologous protein was identified in N4 virions <sup>3</sup>.

## Supplementary Table S2. Bacteria, phages, and plasmids

| <i>Bacteria</i>       |                                                                                                         |           |
|-----------------------|---------------------------------------------------------------------------------------------------------|-----------|
| Name                  | Relevant feature                                                                                        | Reference |
| PAO1                  | Standard lab strain                                                                                     | 4         |
| PADR6                 | Frame shift mutation in <i>wzy</i>                                                                      | 5         |
| PAER5b                | Nonsense mutation in <i>wapH</i>                                                                        | 5         |
| PAER6b                | Frame shift mutation in <i>galU</i>                                                                     | 5         |
| PAER10b               | Nonsense mutation in <i>algC</i>                                                                        | 5         |
| <i>Bacteriophages</i> |                                                                                                         |           |
| Name                  | Relevant features <sup>a</sup>                                                                          | Reference |
| DEV                   |                                                                                                         | 6         |
| DEV Δ53               | Deletion 29656-32966; it eliminates gp53                                                                | This work |
| <i>Plasmids</i>       |                                                                                                         |           |
| Name                  | Relevant features <sup>a</sup>                                                                          | Reference |
| pCas3cRh              | It expresses the components of Type I-C CRISPR-Cas system                                               | 7         |
| pCas3-01              | pCas3cRh derivative carrying DEV 31196-31229 region; it expresses cr-RNA53 targeting gp53               | This work |
| pCas3-09              | pCas3-01 derivative carrying the two gp53 flanking regions with coordinates 29171-29655 and 32967-33450 | This work |
| pD53                  | pGM2148 derivative with 9 silent point mutations in the 31198-31230 region targeted by cr-RNA53         | This work |
| pGM931                | Shuttle vector carrying <i>araC-araBp</i> region                                                        | 8         |
| pGM2148               | pGM931 derivative carrying the gp53-encoding 29656-32949 region                                         | This work |
| gp72_pET 30b(+)       | untagged gp72 cloned in pET30b(+) between NdeI and XhoI                                                 | This work |
| gp73_pET 22b(+)       | gp73 cloned in pET22b(+) between NdeI and XhoI comprising C-terminal 6x his tag                         | This work |

<sup>a</sup> Coordinates refer to Genbank MF490238.1

**Supplementary Table S3. Oligonucleotides used in this study**

| <b>Name</b> | <b>Sequence<sup>a</sup></b>                       | <b>Coordinates<sup>b</sup></b>    |
|-------------|---------------------------------------------------|-----------------------------------|
| 3697        | GAAACGTGCCCTGCATGGAGTTGAACAGCACTACCTGAGG          | 31195-31229                       |
| 3698        | GCGACCTCAGGTAGTGCTGTTCAACTCCATGCAGGGCACG          | 31229-31195                       |
| 3804        | CTCTCTACTGTTTCTCCATGGTACACGGTACACTGCACGCTC        | 32966-32949                       |
| 3805        | GACTCTAGAGGATCCCCGGGTACTTATTTCCACCGTCCTACTG<br>CG | 29656-29677                       |
| 3806        | CCCTCATGGTTTCATGGAC                               | 33450-33432                       |
| 3807        | TTATTCGATGGCCAACAAAGG                             | 32967-32987                       |
| 3808        | <b>CTTTGTTGGCCATCGAATAATGCAATTCATCCTCAAGCCTG</b>  | <b>32987-32967</b><br>29654-29635 |
| 3809        | GTGAGGTCAGCTGTCTCC                                | 29171-29188                       |
| 3840        | CGGGGATTCCCTTAAGGTACCCTCATGGTTTCATGGAC            | 33450-33432                       |
| 3841        | GTTATGCAGCGGAAAGTAGTGAGGTCAGCTGTCTCC              | 29171-29188                       |
| 3859        | GAAGAGGACAACCTTGTGCACCGACAGCATGAAGC               | 31230-31198                       |
| 3955        | AATTCGATGCAAGGGACGAAGGCGTACAACGATG                | 31212-31179                       |
| 3969        | CGTCACCAGCAGCAGTCTG                               | 54401-54419                       |
| 3970        | TTCGGAGTCGAGTTGGATACTTC                           | 56827-56805                       |
| Gp72-f      | CGCTATGGCATATGAACGAAGAACACGCTATTC                 |                                   |
| Gp72-r      | CGCTATCTCGAGTTACTCTTCATCCTCCTCTTC                 |                                   |
| Gp73-f      | CGCTATGGCATATGGCCTATCCGTACAGTGATATG               |                                   |
| Gp73-r      | CGCTATCTCGAGGCGAATCCGGTTCCGTTCC                   |                                   |

<sup>a</sup>DEV sequences are in italics. Silent mutations in 3859 and 3955 are in yellow.

<sup>b</sup>Coordinates refer to GenBank MF490238.1



**Supplementary Table S4. Residues involved in the intermolecular interactions between gp72-gp73.**

| Gp72  | Residue position (Chain) | Gp73  | Residue position (Chain) | Type of interaction | Non-bonded contacts (<4Å) |
|-------|--------------------------|-------|--------------------------|---------------------|---------------------------|
| Gln44 | J                        | Phe64 | A                        | H bond              | 56                        |
| Gly25 | J                        | Ala94 | B                        | H bond              | 27                        |
| Gly25 | J                        | Gln98 | B                        | H bond              |                           |
| Gly25 | K                        | Ala94 | C                        | H bond              | 32                        |
| Asn50 | K                        | Gln73 | C                        | H bond              |                           |
| Gln44 | K                        | Phe64 | I                        | H bond              | 56                        |
| Gln44 | L                        | Phe64 | B                        | H bond              | 38                        |
| Gly25 | L                        | Ala94 | D                        | H bond              | 31                        |
| Gly25 | M                        | Ala94 | E                        | H bond              | 29                        |
| Gly25 | M                        | Gln98 | E                        | H bond              |                           |
| Gln44 | M                        | Phe64 | F                        | H bond              | 55                        |
| Asn50 | N                        | Gln73 | F                        | H bond              | 25                        |
| Gly25 | N                        | Gln98 | F                        | H bond              |                           |
|       | N                        |       | G                        |                     | 40                        |
| Gly25 | O                        | Ala94 | G                        | H bond              | 28                        |
| Gln44 | O                        | Phe64 | H                        | H bond              | 56                        |
| Gly25 | P                        | Ala94 | H                        | H bond              | 26                        |
| Asn50 | P                        | Gln73 | H                        | H bond              |                           |
|       | P                        |       | C                        |                     | 62                        |
| Gly25 | Q                        | Ala94 | I                        | H bond              | 29                        |
| Gly25 | Q                        | Gln98 | I                        | H bond              |                           |
| Asn50 | Q                        | Gln73 | I                        | H bond              |                           |
| Gln44 | Q                        | Phe64 | D                        | H bond              | 47                        |
| Gly25 | R                        | Gln98 | A                        | H bond              | 29                        |
| Asn50 | R                        | Gln73 | A                        | H bond              |                           |
| Gln44 | R                        | Phe64 | E                        | H bond              | 57                        |

Intermolecular interactions between gp72 (chains J-R) and gp73 (chains A-I). The total number of non-bonded contacts (<4Å) between the chains of the gp72 and gp73 are shown in the last column.

**Supplementary Table S5. Summary of lipid bilayer experiments with purified DEV ejection proteins at 100 mV in DPhPC membranes.**

| <b>Sample</b> | <b>Total membranes</b> | <b>Membranes with insertions</b> | <b>Comments</b>                                                                                                                   |
|---------------|------------------------|----------------------------------|-----------------------------------------------------------------------------------------------------------------------------------|
| Buffer        | 6                      | 0                                | The buffer does not produce any insertion-like events.                                                                            |
| gp73          | 88                     | 17<br>(a total of 33 insertions) | Insertions observed in the range of 0.3 – 2.6 $\mu\text{g}$ protein; observed pores were heterogeneous.                           |
| gp72          | 7                      | 0                                | 24 $\mu\text{g}$ of protein was tested, which was 10 times greater than gp73.                                                     |
| gp72:gp73     | 19                     | 1                                | No insertions, one membrane had 10-20 pA fluctuations of the baseline when 10 $\mu\text{g}$ of protein sample was in the cuvette. |

**Supplementary Table S6. Names and accession numbers for all *Schitoviridae* genome sequences considered in this study. Accession numbers for gp71/gp50, gp72/gp51 and gp73/gp52 homologs are provided for each genome.**

| Phage                           | Genome sequence Accession | GP71 candidate | GP72 candidate | GP73 candidate | Clade* | Exemplar** |
|---------------------------------|---------------------------|----------------|----------------|----------------|--------|------------|
| Escherichia_phage_vB_EcoM_PD205 | GCA_024830925.1           | UVK80525.1     | UVK80524.1     | UVK80523.1     | 1      |            |
| Escherichia_phage_KKP_3715      | GCA_030875165.1           | WLW40941.1     | WLW40940.1     | WLW40939.1     | 1      |            |
| Escherichia_phage_vB_EcoP_SP5M  | GCA_013426605.1           | QLF80667.1     | QLF80676.1     | QLF80705.1     | 1      |            |
| Escherichia_phage_vB_EcoP-ZQ2   | GCA_019095225.1           | QWY13177.1     | QWY13176.1     | QWY13175.1     | 1      |            |
| Escherichia_phage_PD38          | GCA_003575305.1           | AXY81341.1     | AXY81342.1     | AXY81343.1     | 1      |            |
| Shigella_virus_Moo19            | GCA_020882845.1           | UEN68863.1     | UEN68864.1     | UEN68865.1     | 1      |            |
| Escherichia_phage_PGN829.1      | GCA_003575565.1           | AXY82599.1     | AXY82598.1     | AXY82596.1     | 1      |            |
| Escherichia_phage_HK2           | GCA_038023635.1           | WYA83849.1     | WYA83848.1     | WYA83847.1     | 1      |            |
| Escherichia_phage_EC1-UPM       | GCA_002617245.1           | AGC31565.1     | AGC31566.1     | AGC31567.1     | 1      |            |
| Escherichia_phage_vB_EcoS_Uz-1  | GCA_025085925.1           | UWJ04322.1     | UWJ04319.1     | UWJ04318.1     | 1      |            |
| Escherichia_phage_UE-S5a        | GCA_036584225.1           | WVP99857.1     | WVP99856.1     | WVP99855.1     | 1      |            |
| Escherichia_phage_ECBP1         | GCA_000900235.1           | AFR52009.1     | AFR52010.1     | AFR52011.1     | 1      |            |
| Escherichia_phage_IME11         | GCA_000903115.1           | AFV29065.1     | AFV29064.1     | AFV29063.1     | 1      |            |
| Escherichia_phage_N4            | GCA_000867865.1           | AAO24831.2     | AAO24830.1     | AAO24829.1     | 1      | Yes        |
| Escherichia_phage_phi_G17       | GCA_003307555.1           | AWY03381.1     | AWY03380.1     | AWY03379.1     | 1      |            |
| Escherichia_phage_AlfredRasser  | GCA_020892825.1           | QXV75793.1     | QXV75792.1     | QXV75791.1     | 1      |            |
| Escherichia_phage_Bp4           | GCA_000922735.2           | AJB43741.1     | AJB43738.1     | AHN83378.1     | 1      |            |
| Escherichia_phage_OLB145        | GCA_003723055.1           | AYR04234.1     | AYR04235.1     | AYR04236.1     | 1      |            |
| Escherichia_phage_E20           | GCA_027183915.1           | WAQ79258.1     | WAQ79267.1     | WAQ79292.1     | 1      |            |
| Escherichia_phage_vB_Eco_SPSP   | GCA_920105895.1           | CAH0462296.1   | CAH0462297.1   | CAH0462298.1   | 1      |            |
| Escherichia_phage_St11Ph5       | GCA_002956185.1           | ATS92525.1     | ATS92526.1     | ATS92527.1     | 1      |            |
| Escherichia_phage_U1G           | GCA_020475385.1           | QXV71896.1     | QXV71897.1     | QXV71899.1     | 1      |            |
| Escherichia_phage_VEC25         | GCA_016103715.1           | QPN96319.1     | QPN96320.1     | QPN96322.1     | 1      |            |

|                                             |                     |                  |                  |                  |   |  |
|---------------------------------------------|---------------------|------------------|------------------|------------------|---|--|
| Escherichia_phage_vB_Eco_F22                | GCA_0276179<br>65.1 | WBF79664.<br>1   | WBF79673.<br>1   | WBF79699.<br>1   | 1 |  |
| Escherichia_phage_vB_EcoP_3HA<br>13         | GCA_0131120<br>55.1 | QDF14948.<br>1   | QDF14949.<br>1   | QDF14950.<br>1   | 1 |  |
| Escherichia_phage_vB_EcoP_PhA<br>PEC7       | GCA_0009242<br>15.1 | AHV82680.<br>1   | AHV82681.<br>1   | AHV82682.<br>1   | 1 |  |
| Escherichia_phage_PMBT57                    | GCA_0029583<br>65.1 | AUV59054.<br>1   | AUV59055.<br>1   | AUV59056.<br>1   | 1 |  |
| Escherichia_phage_vB_EcoP_PhA<br>PEC5       | GCA_0009225<br>15.1 | AGV99338.<br>1   | AGV99339.<br>1   | AGV99340.<br>1   | 1 |  |
| Escherichia_phage_vB_Eco_AL25               | GCA_9433232<br>95.1 | CAH64218<br>70.1 | CAH64218<br>71.1 | CAH64218<br>72.1 | 1 |  |
| Escherichia_phage_vB_Eco_Jura               | GCA_9052196<br>75.1 | CAE64101<br>47.1 | CAE64101<br>62.1 | CAE64101<br>78.1 | 1 |  |
| Klebsiella_phage_VLCpiP4b                   | GCA_0250854<br>55.1 | UVX31104.<br>1   | UVX31105.<br>1   | UVX31106.<br>1   | 1 |  |
| Klebsiella_phage_KP8                        | GCA_0029974<br>55.1 | AVJ48977.2       | AVJ48978.1       | AVJ48979.2       | 1 |  |
| Klebsiella_phage_VLCpiP4a                   | GCA_0250854<br>25.1 | UVX30959.<br>1   | UVX30958.<br>1   | UVX30957.<br>1   | 1 |  |
| Achromobacter_phage_JWAalpha                | GCA_0009147<br>75.1 | AHC94021.<br>1   | AHC94022.<br>1   | AHC94023.<br>1   | 1 |  |
| Achromobacter_phage_vB_AxyP_<br>19-32_Axy04 | GCA_0069643<br>25.1 | QDH83729<br>.1   | QDH83737<br>.1   | QDH83760<br>.1   | 1 |  |
| Achromobacter_phage_JWDelta                 | GCA_0026041<br>85.1 | AHC56581.<br>1   | AHC56582.<br>1   | AHC56583.<br>1   | 1 |  |
| Achromobacter_phage_phiAxp-3                | GCA_0022110<br>55.1 | ALA45523.<br>1   | ALA45524.<br>1   | ALA45525.<br>1   | 1 |  |
| Achromobacter_phage_vB_AxyP_<br>19-32_Axy10 | GCA_0069643<br>85.1 | QDH83913<br>.1   | QDH83920<br>.1   | QDH83946<br>.1   | 1 |  |
| Achromobacter_phage_vB_AxyP_<br>19-32_Axy13 | GCA_0069644<br>45.1 | QDH84159<br>.1   | QDH84166<br>.1   | QDH84191<br>.1   | 1 |  |
| Achromobacter_phage_vB_AxyP_<br>19-32_Axy24 | GCA_0069646<br>25.1 | QDH84720<br>.1   | QDH84728<br>.1   | QDH84752<br>.1   | 1 |  |
| Achromobacter_phage_vB_AxyP_<br>19-32_Axy11 | GCA_0069644<br>05.1 | QDH83996<br>.1   | QDH84004<br>.1   | QDH84030<br>.1   | 1 |  |
| Achromobacter_phage_vB_AxyP_<br>19-32_Axy12 | GCA_0069644<br>25.1 | QDH84077<br>.1   | QDH84084<br>.1   | QDH84109<br>.1   | 1 |  |
| Achromobacter_phage_vB_AxyP_<br>19-32_Axy22 | GCA_0069645<br>85.1 | QDH84592<br>.1   | QDH84599<br>.1   | QDH84626<br>.1   | 1 |  |
| Pseudomonas_phage_inbricus                  | GCA_0029571<br>55.1 | ATW58114.<br>1   | ATW58115.<br>1   | ATW58116.<br>1   | 1 |  |
| Pseudomonas_phage_Zuri                      | GCA_0083754<br>35.2 | QEM41168.<br>1   | QEM41169.<br>1   | QEM41170.<br>1   | 1 |  |
| Erwinia_phage_vB_EamP_Rexella               | GCA_0027576<br>95.1 | ANJ65299.<br>1   | ANJ65300.<br>1   | ANJ65301.<br>1   | 1 |  |
| Erwinia_phage_vB_EamP_Frozen                | GCA_0022110<br>75.1 | ANJ65200.<br>1   | ANJ65201.<br>1   | ANJ65202.<br>1   | 1 |  |
| Erwinia_phage_vB_EamP_Gutmei<br>ster        | GCA_0027577<br>15.1 | ANJ65375.<br>1   | ANJ65376.<br>1   | ANJ65377.<br>2   | 1 |  |
| Erwinia_phage_Ea9-2                         | GCA_0009172<br>95.1 | AHI60130.<br>1   | AHI60131.<br>1   | AHI60132.<br>1   | 1 |  |
| Erwinia_phage_Kuerle                        | GCA_0278864<br>55.1 | WBQ32526<br>.1   | WBQ32527<br>.1   | WBQ32528<br>.1   | 1 |  |

|                                     |                     |                |                |                |   |     |
|-------------------------------------|---------------------|----------------|----------------|----------------|---|-----|
| Erwinia_phage_Fifi067               | GCA_0268982<br>95.1 | WAK44948.<br>1 | WAK44947.<br>1 | WAK44946.<br>1 | 1 |     |
| Stenotrophomonas_phage_Piffle       | GCA_0204843<br>05.1 | QYW01922<br>.1 | QYW01923<br>.1 | QYW01924<br>.1 | 1 |     |
| Stenotrophomonas_phage_Paxi         | GCA_0204841<br>55.1 | QYW01833<br>.1 | QYW01834<br>.1 | QYW01835<br>.1 | 1 |     |
| Xanthomonas_virus_PB119             | GCA_0329181<br>95.1 | UZV39846.<br>1 | UZV39847.<br>1 | UZV39848.<br>1 | 1 |     |
| Xanthomonas_phage_RiverRider        | GCA_0030141<br>95.2 | AVO23151.<br>1 | AVO23152.<br>1 | AVO23153.<br>1 | 1 |     |
| Stenotrophomonas_phage_Pokke<br>n   | GCA_0082153<br>05.1 | QEG09290.<br>1 | QEG09291.<br>1 | QEG09292.<br>1 | 1 |     |
| Podoviridae_sp._ctda_1              | GCA_0036575<br>85.1 | AXH72064.<br>1 | AXH72079.<br>1 | AXH72022.<br>1 | 1 |     |
| Stenotrophomonas_phage_Philip<br>pe | GCA_0204842<br>75.1 | QYW02270<br>.1 | QYW02271<br>.1 | QYW02272<br>.1 | 1 |     |
| Stenotrophomonas_phage_C121         | GCA_0222136<br>15.1 | UKL14807.<br>1 | UKL14808.<br>1 | UKL14809.<br>1 | 1 |     |
| Alcaligenes_phage_vB_Af_QDWS<br>595 | GCA_0205231<br>95.2 | UCR75508.<br>1 | UCR75507.<br>1 | UCR75506.<br>1 | 1 |     |
| Delftia_phage_RG-2014               | GCA_0020378<br>15.1 | AIU44322.1     | AIU44323.1     | AIU44324.1     | 1 |     |
| Burkholderia_phage_vB_BpP_HN<br>02  | GCA_0364294<br>25.1 | WVK89986.<br>1 | WVK89988.<br>1 | WVK89989.<br>1 | 1 |     |
| Burkholderia_phage_vB_BpP_HN<br>01  | GCA_0232398<br>75.1 | UNI71499.<br>1 | UNI71500.<br>1 | UNI71501.<br>1 | 1 |     |
| Sinorhizobium_phage_ort11           | GCA_0086056<br>85.1 | QEP29865.<br>1 | QEP29866.<br>1 | QEP29867.<br>1 | 2 |     |
| Rhizobium_phage_RHph_I1_6           | GCA_0168356<br>25.1 | QIG76594.<br>1 | QIG76595.<br>1 | QIG76596.<br>1 | 2 |     |
| Rhizobium_phage_RHph_Y2_6           | GCA_0168353<br>75.1 | QIG68811.<br>1 | QIG68812.<br>1 | QIG68813.<br>1 | 2 |     |
| Rhizobium_phage_RHEph16             | GCA_0204920<br>45.1 | QXV74378.<br>1 | QXV74379.<br>1 | QXV74380.<br>1 | 2 |     |
| Rhizobium_phage_RHph_X3_15          | GCA_0204920<br>15.1 | QWY83756<br>.1 | QWY83757<br>.1 | QWY83758<br>.1 | 2 |     |
| Rhizobium_phage_RHEph24             | GCA_0204920<br>85.1 | QXV74841.<br>1 | QXV74842.<br>1 | QXV74843.<br>1 | 2 |     |
| Rhizobium_phage_RHph_N38            | GCA_0168358<br>45.1 | QIG70535.<br>1 | QIG70536.<br>1 | QIG70537.<br>1 | 2 |     |
| Rhizobium_phage_RHEph22             | GCA_0204920<br>75.1 | QXV74747.<br>1 | QXV74748.<br>1 | QXV74749.<br>1 | 2 |     |
| Rhizobium_phage_RHph_X2_28B         | GCA_0204920<br>05.1 | QWY83520<br>.1 | QWY83521<br>.1 | QWY83522<br>.1 | 2 |     |
| Rhizobium_phage_RHph_Y38            | GCA_0168361<br>55.1 | QIG67777.<br>1 | QIG67778.<br>1 | QIG67779.<br>1 | 2 | Yes |
| Agrobacterium_phage_OLIVR2          | GCA_0179035<br>05.1 | QIW87388.<br>1 | QIW87389.<br>1 | QIW87390.<br>1 | 2 |     |
| Agrobacterium_phage_OLIVR3          | GCA_0179035<br>15.1 | QIW87495.<br>1 | QIW87496.<br>1 | QIW87497.<br>1 | 2 |     |
| Agrobacterium_phage_OLIVR1          | GCA_0179034<br>85.1 | QIW87281.<br>1 | QIW87282.<br>1 | QIW87283.<br>1 | 2 |     |
| Pseudomonas_phage_ZC08              | GCA_0026055<br>25.1 | AMD43541.<br>1 | AMD43540.<br>1 | AMD43539.<br>1 | 3 | Yes |

|                                    |                     |                |                |                |   |     |
|------------------------------------|---------------------|----------------|----------------|----------------|---|-----|
| Pseudomonas_phage_ZC03             | GCA_0026055<br>05.1 | AMD43402.<br>1 | AMD43403.<br>1 | AMD43404.<br>1 | 3 |     |
| Roseovarius_Plymouth_podovirus_1   | GCA_0087255<br>35.1 | CBX87992.<br>1 | CBX87993.<br>1 | CBX87994.<br>1 | 4 |     |
| Dinoroseobacter_phage_DS-1410Ws-06 | GCA_0033291<br>45.1 | ANJ20714.<br>1 | ANJ20715.<br>1 | ANJ20716.<br>1 | 4 |     |
| Roseobacter_phage_RD-1410Ws-07     | GCA_0033291<br>65.1 | ANJ20865.<br>1 | ANJ20866.<br>1 | ANJ20867.<br>1 | 4 |     |
| Dinoroseobacter_phage_DFL12phi1    | GCA_0009230<br>15.1 | AHX00983.<br>1 | AHX00982.<br>1 | AHX00981.<br>1 | 4 |     |
| Ruegeria_phage_vB_RpoP-V21         | GCA_0033086<br>75.1 | AWY09017.<br>1 | AWY09018.<br>1 | AWY09019.<br>1 | 4 |     |
| Ruegeria_phage_vB_RpoP-V13         | GCA_0033087<br>35.1 | AWY09411.<br>1 | AWY09412.<br>1 | AWY09413.<br>1 | 4 |     |
| Ruegeria_phage_vB_RpoP-V14         | GCA_0033693<br>25.1 | AXF42182.<br>1 | AXF42183.<br>1 | AXF42184.<br>1 | 4 | Yes |
| Roseovarius_sp._217_phage_1        | GCA_0033291<br>85.1 | CBW47056<br>.1 | CBW47057<br>.1 | CBW47058<br>.1 | 4 |     |
| Dinoroseobacter_phage_vB_DshP-R7L  | GCA_0204896<br>65.1 | UAT28905.<br>1 | UAT28906.<br>1 | UAT28907.<br>1 | 4 |     |
| Ruegeria_phage_vB_RpoP-V17         | GCA_0033087<br>75.1 | AWY09578.<br>1 | AWY09579.<br>1 | AWY09580.<br>1 | 4 |     |
| Silicibacter_phage_DSS3phi2        | GCA_0008829<br>35.1 | ACL81328.<br>1 | ACL81329.<br>1 | ACL81330.<br>1 | 4 |     |
| Ruegeria_phage_vB_RpoP-V12         | GCA_0033086<br>15.1 | AWY08849.<br>1 | AWY08850.<br>1 | AWY08851.<br>1 | 4 |     |
| Dinoroseobacter_phage_vBDshP R2C   | GCA_0026045<br>25.1 | AID16877.<br>1 | AID16878.<br>1 | AID16879.<br>1 | 4 |     |
| Roseobacter_phage_RD-1410W1-01     | GCA_0033292<br>05.1 | ANJ20798.<br>1 | ANJ20799.<br>1 | ANJ20800.<br>1 | 4 |     |
| Sulfitobacter_phage_phiCB2047-B    | GCA_0009059<br>95.1 | AGH07392.<br>1 | AGH07390.<br>1 | AGH07389.<br>1 | 4 |     |
| Erwinia_phage_Pastis               | GCA_0333111<br>55.1 | WJN64599.<br>1 | WJN64600.<br>1 | WJN64601.<br>1 | 5 | Yes |
| Erwinia_phage_vB_EamP-S6           | GCA_0009018<br>55.1 | AEJ81598.1     | AEJ81599.1     | AEJ81600.1     | 5 |     |
| Salmonella_phage_vB_SenP_UTK 0002  | GCA_0288976<br>15.1 | WDR22564<br>.1 | WDR22565<br>.1 | WDR22566<br>.1 | 6 |     |
| Escherichia_phage_Pollock          | GCA_0010421<br>95.1 | AIX12418.1     | AIX12419.1     | AIX12420.1     | 6 |     |
| Pseudomonas_phage_MY01             | GCA_0351350<br>45.1 | WQY99713<br>.1 | WQY99714<br>.1 | WQY99715<br>.1 | 6 |     |
| Salmonella_phage_FSL_SP-076        | GCA_0009095<br>55.1 | AGF88373.<br>1 | AGF88374.<br>1 | AGF88375.<br>1 | 6 |     |
| Klebsiella_phage_KpCHEMY26         | GCA_0079985<br>55.1 | QEA03295.<br>1 | QEA03303.<br>1 | QEA03328.<br>1 | 6 |     |
| Enterobacter_phage_EcP1            | GCA_0009006<br>55.1 | ADU79201.<br>1 | ADU79202.<br>1 | ADU79203.<br>1 | 6 |     |
| Salmonella_phage_FSL_SP-058        | GCA_0009088<br>95.1 | AGF88174.<br>1 | AGF88175.<br>1 | AGF88176.<br>1 | 6 |     |
| Shigella_phage_B2                  | GCA_0246061<br>55.1 | UUG68314.<br>1 | UUG68315.<br>1 | UUG68316.<br>1 | 6 | Yes |
| Salmonella_phage_vB_SenP_UTK 0001  | GCA_0288976<br>05.1 | WDR22471<br>.1 | WDR22472<br>.1 | WDR22473<br>.1 | 6 |     |

|                                        |                     |                |                |                |   |  |
|----------------------------------------|---------------------|----------------|----------------|----------------|---|--|
| Salmonella_phage_SP154                 | GCA_0302219<br>85.1 | WIC41624.<br>1 | WIC41625.<br>1 | WIC41626.<br>1 | 6 |  |
| Salmonella_phage_vB_SalP_TR2           | GCA_0173479<br>05.1 | QSJ04060.<br>1 | QSJ04059.<br>1 | QSJ04058.<br>1 | 6 |  |
| Pseudomonas_phage_phCDa                | GCA_0033414<br>35.1 | AXC36451.<br>1 | AXC36452.<br>1 | AXC36453.<br>1 | 7 |  |
| Pseudomonas_phage_98PfluR60<br>PP      | GCA_0031433<br>95.1 | AWH15475<br>.1 | AWH15476<br>.1 | AWH15477<br>.1 | 7 |  |
| Pseudomonas_phage_Littlefix            | GCA_0029584<br>75.1 | AUV61826.<br>1 | AUV61827.<br>1 | AUV61828.<br>1 | 7 |  |
| Pseudomonas_phage_vB_PaeS_T<br>UMS_P6  | GCA_0212165<br>75.1 | UGL60893.<br>1 | UGL60892.<br>1 | UGL60891.<br>1 | 7 |  |
| Pseudomonas_phage_vB_PaeP_Y<br>L2      | GCA_0380230<br>55.1 | WMI40382.<br>1 | WMI40381.<br>1 | WMI40380.<br>1 | 7 |  |
| Pseudomonas_phage_phiPA1-3             | GCA_0304395<br>85.1 | WJY90848.<br>1 | WJY90849.<br>1 | WJY90850.<br>1 | 7 |  |
| Pseudomonas_phage_vB_Pae575<br>P-3     | GCA_0026111<br>45.1 | ANT44349.<br>1 | ANT44350.<br>1 | ANT44351.<br>1 | 7 |  |
| Pseudomonas_phage_vB_Pae139<br>6P-5    | GCA_0026111<br>65.1 | ANT44439.<br>1 | ANT44440.<br>1 | ANT44441.<br>1 | 7 |  |
| Pseudomonas_phage_vB_PaeP_P<br>YO2     | GCA_0029559<br>35.1 | ASZ72120.<br>1 | ASZ72121.<br>1 | ASZ72122.<br>1 | 7 |  |
| Pseudomonas_phage_vB_PaeS_T<br>UMS_P81 | GCA_0212165<br>85.1 | UGL60979.<br>1 | UGL60978.<br>1 | UGL60977.<br>1 | 7 |  |
| Pseudomonas_phage_vB_PaeP_4<br>029     | GCA_0257673<br>25.1 | UYE96391.<br>1 | UYE96483.<br>1 | UYE96482.<br>1 | 7 |  |
| Pseudomonas_phage_YH30                 | GCA_0015513<br>85.1 | AKC04779.<br>1 | AKC04777.<br>1 | AKC04776.<br>1 | 7 |  |
| Pseudomonas_phage_LP14                 | GCA_0033073<br>95.1 | AWY02724.<br>1 | AWY02723.<br>1 | AWY02722.<br>1 | 7 |  |
| Pseudomonas_phage_PAP02                | GCA_0225164<br>25.1 | QKE55114.<br>1 | QKE55115.<br>1 | QKE55116.<br>1 | 7 |  |
| Pseudomonas_phage_Pa2                  | GCA_0010409<br>95.1 | AIZ94913.1     | AIZ94914.1     | AIZ94915.1     | 7 |  |
| Pseudomonas_phage_phi176               | GCA_0027564<br>15.1 | AIZ95005.1     | AIZ95006.1     | AIZ95007.1     | 7 |  |
| Pseudomonas_phage_PASB7                | GCA_0348576<br>65.1 | WNV46167<br>.1 | WNV46168<br>.1 | WNV46169<br>.1 | 7 |  |
| Pseudomonas_phage_PEV2                 | GCA_0017453<br>75.1 | ANJ63774.<br>1 | ANJ63775.<br>1 | ANJ63776.<br>1 | 7 |  |
| Pseudomonas_phage_vB_Pae-<br>PA14      | GCA_0302946<br>85.1 | QWT71827<br>.1 | QWT71828<br>.1 | QWT71829<br>.1 | 7 |  |
| Pseudomonas_phage_KPP21                | GCA_0015015<br>35.1 | BAR94673.<br>1 | BAR94561.<br>1 | BAR94562.<br>1 | 7 |  |
| Pseudomonas_phage_PaVOB                | GCA_0299483<br>65.1 | WGN90647<br>.1 | WGN90650<br>.1 | WGN90676<br>.1 | 7 |  |
| Pseudomonas_phage_vB_PaeP_Y<br>L1      | GCA_0380230<br>45.1 | WMI40290.<br>1 | WMI40291.<br>1 | WMI40292.<br>1 | 7 |  |
| Pseudomonas_phage_VB_PaeP_V<br>L1      | GCA_0213546<br>65.1 | UGV19870.<br>1 | UGV19871.<br>1 | UGV19873.<br>1 | 7 |  |
| Pseudomonas_phage_PWJ                  | GCA_0316783<br>05.1 | WMX17950<br>.1 | WMX17951<br>.1 | WMX17952<br>.1 | 7 |  |
| Pseudomonas_phage_Ka4                  | GCA_0364949<br>45.1 | WVM05154<br>.1 | WVM05155<br>.1 | WVM05156<br>.1 | 7 |  |

|                                          |                     |                |                |                |   |     |
|------------------------------------------|---------------------|----------------|----------------|----------------|---|-----|
| Pseudomonas_phage_LIT1                   | GCA_0008846<br>15.1 | CAZ66327.<br>1 | CAZ66328.<br>1 | CAZ66329.<br>1 | 7 |     |
| Pseudomonas_phage_vB_PaeP_T<br>UMS_P121  | GCA_0209066<br>75.1 | UEP18653.<br>1 | UEP18652.<br>1 | UEP18651.<br>1 | 7 |     |
| Pseudomonas_phage_vB_PaeP_4<br>034       | GCA_0257673<br>65.1 | UYE96669.<br>1 | UYE96670.<br>1 | UYE96671.<br>1 | 7 |     |
| Pseudomonas_phage_vB_PaeP_F<br>MD5       | GCA_0371983<br>75.1 | WWY65178<br>.1 | WWY65177<br>.1 | WWY65176<br>.1 | 7 |     |
| Pseudomonas_phage_vB_Pae_A<br>M.P2       | GCA_0161176<br>75.1 | QKE55967.<br>1 | QKE55968.<br>1 | QKE55969.<br>1 | 7 |     |
| Pseudomonas_phage_LUZ7                   | GCA_0008862<br>35.1 | CAZ66214.<br>1 | CAZ66215.<br>1 | CAZ66216.<br>1 | 7 |     |
| Pseudomonas_phage_vB_PaeP_P<br>S28       | GCA_0303785<br>35.1 | WBM84633<br>.1 | WBM84725<br>.1 | WBM84724<br>.1 | 7 |     |
| Pseudomonas_phage_PA26                   | GCA_0026172<br>65.1 | AFO70568.<br>1 | AFO70569.<br>1 | AFO70570.<br>1 | 7 |     |
| Pseudomonas_phage_vB_PaeP_D<br>EV        | GCA_0029559<br>55.1 | ASZ72278.<br>1 | ASZ72279.<br>1 | ASZ72280.<br>1 | 7 | Yes |
| Pseudomonas_phage_CMS1                   | GCA_0228183<br>75.1 | UNY40777.<br>1 | UNY40778.<br>1 | UNY40779.<br>1 | 7 |     |
| Pseudomonas_phage_vB_PaeP_<br>MAG4       | GCA_0017443<br>75.1 | AKH49516.<br>1 | AKH49517.<br>1 | AKH49518.<br>1 | 7 |     |
| Pseudomonas_phage_vB_PaeP_T<br>UMS_P10   | GCA_0226945<br>65.1 | UNI71975.<br>1 | UNI71974.<br>1 | UNI71973.<br>1 | 7 |     |
| Pseudomonas_phage_PJNP053                | GCA_0368521<br>85.1 | WVX91144.<br>1 | WVX91145.<br>1 | WVX91146.<br>1 | 7 |     |
| Pseudomonas_phage_PA15                   | GCA_0222137<br>05.1 | WJZ49002.<br>1 | WJZ49003.<br>1 | WJZ49004.<br>1 | 7 |     |
| Pseudomonas_phage_vB_PaeP_4<br>032       | GCA_0257673<br>55.1 | UYE96582.<br>1 | UYE96484.<br>1 | UYE96485.<br>1 | 7 |     |
| Pseudomonas_phage_YH6                    | GCA_0010414<br>35.1 | AIX13227.1     | AIX13228.1     | AIX13229.1     | 7 |     |
| Pseudomonas_phage_Ka3                    | GCA_0351350<br>25.1 | WQZ52371<br>.1 | WQZ52372<br>.1 | WQZ52373<br>.1 | 7 |     |
| Pseudomonas_phage_vB_PaeP_C<br>2-10_Ab09 | GCA_0009182<br>75.1 | CDN96879.<br>1 | CDN96880.<br>1 | CDN96881.<br>1 | 7 |     |
| Pseudomonas_phage_DL64                   | GCA_0015023<br>75.1 | AKF13985.<br>1 | AKF13984.<br>1 | AKF13983.<br>1 | 7 |     |
| Pseudomonas_phage_vB_Pae_H<br>MKU_23     | GCA_0356808<br>35.1 | WRN92285<br>.1 | WRN92284<br>.1 | WRN92283<br>.1 | 7 |     |
| Pseudomonas_phage_RWG                    | GCA_0027563<br>95.1 | AIZ94822.1     | AIZ94823.1     | AIZ94824.1     | 7 |     |
| Pseudomonas_phage_vB_PaeP_F<br>BPa1      | GCA_0248308<br>25.1 | UVN14444.<br>1 | UVN14445.<br>1 | UVN14446.<br>1 | 7 |     |
| Pseudomonas_phage_L15                    | GCA_0324604<br>75.1 | WNV49457<br>.1 | WNV49456<br>.1 | WNV49455<br>.1 | 7 |     |
| Pseudomonas_phage_vB_Pae_TU<br>MS_P11    | GCA_0345134<br>85.1 | WQA18395<br>.1 | WQA18394<br>.1 | WQA18393<br>.1 | 7 |     |
| Pseudomonas_phage_vB_PaP_H<br>N01        | GCA_0364188<br>05.1 | WVH07442<br>.1 | WVH07441<br>.1 | WVH07440<br>.1 | 7 |     |
| Klebsiella_phage_VB_KpP_HS106            | GCA_0268983<br>45.1 | WAK45185.<br>1 | WAK45186.<br>1 | WAK45187.<br>1 | 8 |     |
| Klebsiella_phage_vB_KpP_FBKp2<br>7       | GCA_0168114<br>75.1 | QQV91599.<br>1 | QQV91616.<br>1 | QQV91642.<br>1 | 8 |     |



|                                     |                     |                |                |                |    |     |
|-------------------------------------|---------------------|----------------|----------------|----------------|----|-----|
| Klebsiella_phage_vB_KpnP_P184       | GCA_0173478<br>15.2 | QSJ03719.<br>1 | QSJ03718.<br>1 | QSJ03717.<br>1 | 8  |     |
| Klebsiella_phage_pKP-BM327-1.1      | GCA_0262731<br>75.1 | UZN24491.<br>1 | UZN24492.<br>1 | UZN24493.<br>1 | 8  |     |
| Kosakonia_phage_Kc283               | GCA_0210293<br>85.1 | QYN79871.<br>1 | QYN79872.<br>1 | QYN79873.<br>1 | 8  |     |
| Pectobacterium_phage_vB_PatP_CB3    | GCA_0029899<br>35.1 | ARB11906.<br>1 | ARB11907.<br>1 | ARB11908.<br>1 | 8  |     |
| Pectobacterium_phage_Horatius       | GCA_0157671<br>85.1 | QPL11026.<br>1 | QPL11027.<br>1 | QPL11028.<br>1 | 8  |     |
| Pectobacterium_phage_Possum         | GCA_0157671<br>95.1 | QPL10924.<br>1 | QPL10925.<br>1 | QPL10926.<br>1 | 8  |     |
| Pectobacterium_phage_vB_PatP_CB1    | GCA_0029898<br>95.1 | ARB11804.<br>1 | ARB11805.<br>1 | ARB11806.<br>1 | 8  |     |
| Pectobacterium_phage_Neptra         | GCA_0030943<br>15.1 | AWD92544<br>.1 | AWD92543<br>.1 | AWD92542<br>.1 | 8  | Yes |
| Pectobacterium_phage_vB_PatP_CB4    | GCA_0029899<br>55.1 | AQT27923.<br>1 | AQT27924.<br>1 | AQT27925.<br>1 | 8  |     |
| Acinetobacter_phage_Presley         | GCA_0009173<br>35.1 | AGY48146.<br>1 | AGY48147.<br>1 | AGY48148.<br>1 | 9  | Yes |
| Acinetobacter_phage_nACB1           | GCA_0275745<br>35.1 | WAW11592<br>.1 | WAW11599<br>.1 | WAW11633<br>.1 | 9  |     |
| Vibrio_phage_1.025.O._10N.222.46.B6 | GCA_0039264<br>95.1 | AUR82509.<br>1 | AUR82508.<br>1 | AUR82507.<br>1 | 10 |     |
| Vibrio_phage_vB_VspP_pVa5           | GCA_0026150<br>85.1 | APC46019.<br>1 | APC46042.<br>1 | APC46051.<br>1 | 10 |     |
| Vibrio_phage_1.152.O._10N.222.46.E1 | GCA_0039285<br>75.1 | AUR90932.<br>1 | AUR90931.<br>1 | AUR90930.<br>1 | 10 |     |
| Vibrio_phage_2.130.O._10N.222.46.C2 | GCA_0039313<br>75.1 | AUS02400.<br>1 | AUS02399.<br>1 | AUS02398.<br>1 | 10 |     |
| Vibrio_phage_1.026.O._10N.222.49.C7 | GCA_0039265<br>15.1 | AUR82617.<br>1 | AUR82616.<br>1 | AUR82615.<br>1 | 10 | Yes |
| Vibrio_phage_1.150.O._10N.222.46.A6 | GCA_0039285<br>35.1 | AUR90759.<br>1 | AUR90758.<br>1 | AUR90757.<br>1 | 10 |     |
| Vibrio_phage_VBP47                  | GCA_0009044<br>75.1 | AGH57069.<br>1 | AGH57070.<br>1 | AGH57071.<br>1 | 10 |     |
| Vibrio_phage_VBP32                  | GCA_0009069<br>55.1 | AGH57223.<br>1 | AGH57222.<br>1 | AGH57221.<br>1 | 10 |     |
| Vibrio_phage_phi50-12               | GCA_0093883<br>65.1 | QFR59803.<br>1 | QFR59802.<br>1 | QFR59801.<br>1 | 11 | Yes |
| Vibrio_phage_BUCT194                | GCA_0204755<br>25.1 | UAW01149<br>.1 | UAW01150<br>.1 | UAW01151<br>.1 | 12 |     |
| Vibrio_phage_PhilmVa-1              | GCA_0292697<br>15.1 | UOX40291.<br>1 | UOX40292.<br>1 | UOX40293.<br>1 | 12 | Yes |
| Vibrio_phage_pVco-5                 | GCA_0026207<br>25.1 | ARM71100.<br>1 | ARM71101.<br>1 | ARM71102.<br>1 | 13 |     |
| Vibrio_phage_12VC501                | GCA_0257877<br>95.1 | UYF10881.<br>1 | UYF10880.<br>1 | UYF10879.<br>1 | 13 |     |
| Vibrio_phage_VCO139                 | GCA_0026031<br>65.1 | AGI61882.<br>1 | AGK85679.<br>1 | AGI61883.<br>1 | 13 |     |
| Vibrio_phage_JSf3                   | GCA_0026156<br>85.1 | APD18049.<br>1 | APD18048.<br>1 | APD18047.<br>1 | 13 | Yes |
| Vibrio_phage_JA-1                   | GCA_0009087<br>55.1 | AGI61805.<br>1 | AGI61806.<br>1 | AGI61807.<br>1 | 13 |     |

|                                         |                     |                |                |                |    |     |
|-----------------------------------------|---------------------|----------------|----------------|----------------|----|-----|
| Vibrio_phage_1.188.C._10N.286.<br>51.A6 | GCA_0039292<br>15.1 | AUR93794.<br>1 | AUR93793.<br>1 | AUR93792.<br>1 | 14 | Yes |
| Vibrio_phage_1.188.B._10N.286.<br>51.A6 | GCA_0039291<br>95.1 | AUR93708.<br>1 | AUR93707.<br>1 | AUR93706.<br>1 | 14 |     |
| Vibrio_phage_1.169.O._10N.261.<br>52.B1 | GCA_0039288<br>35.1 | AUR92093.<br>1 | AUR92094.<br>1 | AUR92095.<br>1 | 14 |     |
| Vibrio_phage_1.188.A._10N.286.<br>51.A6 | GCA_0039291<br>75.1 | AUR93622.<br>1 | AUR93621.<br>1 | AUR93620.<br>1 | 14 |     |
| Vibrio_phage_1.261.O._10N.286.<br>51.A7 | GCA_0039305<br>55.1 | AUR99055.<br>1 | AUR99054.<br>1 | AUR99053.<br>1 | 14 |     |
| Vibrio_phage_1.224.A._10N.261.<br>48.B1 | GCA_0039298<br>75.1 | AUR96421.<br>1 | AUR96420.<br>1 | AUR96420.<br>1 | 14 |     |

\* Refers to the clade to which the gp71/gp50 homolog was assigned.

\*\* Sequences used as “exemplars” are indicated.

## SUPPLEMENTARY REFERENCES

1. van Kempen, M. et al. Fast and accurate protein structure search with Foldseek. *Nat Biotechnol* **42**, 243-246 (2024).
2. Ceysens, P.J. et al. Molecular and physiological analysis of three *Pseudomonas aeruginosa* phages belonging to the "N4-like viruses". *Virology* **405**, 26-30 (2010).
3. Choi, K.H. et al. Insight into DNA and protein transport in double-stranded DNA viruses: the structure of bacteriophage N4. *J Mol Biol* **378**, 726-36 (2008).
4. Klockgether, J. et al. Genome diversity of *Pseudomonas aeruginosa* PAO1 laboratory strains. *J Bacteriol* **192**, 1113-21 (2010).
5. Forti, F. et al. Identification and impact on *Pseudomonas aeruginosa* virulence of mutations conferring resistance to a phage cocktail for phage therapy. *Microbiol Spectr* **11**, e0147723 (2023).
6. Forti, F. et al. Design of a Broad-Range Bacteriophage Cocktail That Reduces *Pseudomonas aeruginosa* Biofilms and Treats Acute Infections in Two Animal Models. *Antimicrob Agents Chemother* **62**(2018).
7. Csorgo, B. et al. A compact Cascade-Cas3 system for targeted genome engineering. *Nat Methods* **17**, 1183-1190 (2020).
8. Delvillani, F. et al. Tet-Trap, a genetic approach to the identification of bacterial RNA thermometers: application to *Pseudomonas aeruginosa*. *RNA* **20**, 1963-76 (2014).
